# Supplementary material for: Mutational Screening of the Proteome of Sars-Cov-2 Isolates: Mutability of ORF3a, Nucleocapsid and Nsp2 Proteins
Source: Preprints.org preprint supplement (doi:10.20944/preprints202007.0049.v1), 2020-07-05
Supplement: Supplementary file 1 [file supplementary]

## Sheet: gisaid
>hCoV-19/USA/WA-UW-1682/2020|EPI_ISL_424218|2020-03-20
>hCoV-19/USA/WA-UW-1695/2020|EPI_ISL_424219|2020-03-20
>hCoV-19/USA/WA-UW-1729/2020|EPI_ISL_424220|2020-03-21
>hCoV-19/USA/WA-UW-1748/2020|EPI_ISL_424221|2020-03-21
>hCoV-19/USA/WA-UW-1700/2020|EPI_ISL_424222|2020-03-20
>hCoV-19/USA/WA-UW-1744/2020|EPI_ISL_424223|2020-03-21
>hCoV-19/USA/WA-UW-1745/2020|EPI_ISL_424224|2020-03-21
>hCoV-19/USA/WA-UW-1707/2020|EPI_ISL_424225|2020-03-21
>hCoV-19/USA/WA-UW-1705/2020|EPI_ISL_424226|2020-03-21
>hCoV-19/USA/WA-UW-1706/2020|EPI_ISL_424227|2020-03-21
>hCoV-19/USA/WA-UW-1702/2020|EPI_ISL_424228|2020-03-21
>hCoV-19/USA/WA-UW-1724/2020|EPI_ISL_424229|2020-03-21
>hCoV-19/USA/WA-UW-1709/2020|EPI_ISL_424230|2020-03-21
>hCoV-19/USA/WA-UW-1731/2020|EPI_ISL_424231|2020-03-21
>hCoV-19/USA/WA-UW-1708/2020|EPI_ISL_424232|2020-03-21
>hCoV-19/USA/WA-UW-1772/2020|EPI_ISL_424233|2020-03-21
>hCoV-19/USA/WA-UW-1722/2020|EPI_ISL_424234|2020-03-21
>hCoV-19/USA/WA-UW-1733/2020|EPI_ISL_424235|2020-03-21
>hCoV-19/USA/WA-UW-1732/2020|EPI_ISL_424236|2020-03-21
>hCoV-19/USA/WA-UW-1739/2020|EPI_ISL_424237|2020-03-21
>hCoV-19/USA/WA-UW-1741/2020|EPI_ISL_424238|2020-03-21
>hCoV-19/USA/WA-UW-1750/2020|EPI_ISL_424239|2020-03-21
>hCoV-19/USA/WA-UW-1730/2020|EPI_ISL_424240|2020-03-21
>hCoV-19/USA/WA-UW-1735/2020|EPI_ISL_424241|2020-03-21
>hCoV-19/USA/WA-UW-1753/2020|EPI_ISL_424242|2020-03-21
>hCoV-19/USA/WA-UW-1756/2020|EPI_ISL_424243|2020-03-21
>hCoV-19/USA/WA-UW-1770/2020|EPI_ISL_424244|2020-03-22
>hCoV-19/USA/WA-UW-1762/2020|EPI_ISL_424245|2020-03-21
>hCoV-19/USA/WA-UW-1758/2020|EPI_ISL_424246|2020-03-21
>hCoV-19/USA/WA-UW-1760/2020|EPI_ISL_424247|2020-03-21
>hCoV-19/USA/UN-UW-1773/2020|EPI_ISL_424248|2020-03
>hCoV-19/USA/UN-UW-1791/2020|EPI_ISL_424249|2020-03-20
>hCoV-19/USA/WA-UW-1785/2020|EPI_ISL_424250|2020-03-19
>hCoV-19/USA/WA-UW-1801/2020|EPI_ISL_424251|2020-03-23
>hCoV-19/USA/WA-UW-1840/2020|EPI_ISL_424252|2020-03-23
>hCoV-19/USA/WA-UW-1792/2020|EPI_ISL_424253|2020-03-21
>hCoV-19/USA/WA-UW-1796/2020|EPI_ISL_424254|2020-03-21
>hCoV-19/USA/UN-UW-1832/2020|EPI_ISL_424255|2020-03-16
>hCoV-19/USA/WA-UW-1774/2020|EPI_ISL_424256|2020-03-22
>hCoV-19/USA/WA-UW-1775/2020|EPI_ISL_424257|2020-03-22
>hCoV-19/USA/WA-UW-1778/2020|EPI_ISL_424258|2020-03-22
>hCoV-19/USA/WA-UW-1797/2020|EPI_ISL_424259|2020-03-22
>hCoV-19/USA/WA-UW-1779/2020|EPI_ISL_424260|2020-03-22
>hCoV-19/USA/WA-UW-1784/2020|EPI_ISL_424261|2020-03-21
>hCoV-19/USA/WA-UW-1782/2020|EPI_ISL_424262|2020-03-22
>hCoV-19/USA/WA-UW-1799/2020|EPI_ISL_424263|2020-03-22
>hCoV-19/USA/WA-UW-1805/2020|EPI_ISL_424264|2020-03-22
>hCoV-19/USA/UN-UW-1818/2020|EPI_ISL_424266|2020-03-22
>hCoV-19/USA/UN-UW-1817/2020|EPI_ISL_424267|2020-03-22
>hCoV-19/USA/UN-UW-1816/2020|EPI_ISL_424268|2020-03-22
>hCoV-19/USA/WA-UW-1828/2020|EPI_ISL_424269|2020-03-22
>hCoV-19/USA/WA-UW-1831/2020|EPI_ISL_424270|2020-03-22
>hCoV-19/USA/WA-UW-1827/2020|EPI_ISL_424271|2020-03-22
>hCoV-19/USA/WA-UW-1826/2020|EPI_ISL_424273|2020-03-22
>hCoV-19/USA/WA-UW-1824/2020|EPI_ISL_424274|2020-03-22
>hCoV-19/USA/WA-UW-1821/2020|EPI_ISL_424275|2020-03-22
>hCoV-19/USA/WA-UW-1822/2020|EPI_ISL_424276|2020-03-22
>hCoV-19/USA/WA-UW-1866/2020|EPI_ISL_424278|2020-03-23
>hCoV-19/USA/WA-UW-1850/2020|EPI_ISL_424279|2020-03-23
>hCoV-19/Australia/VIC908/2020|EPI_ISL_426879|2020-03-23
>hCoV-19/Australia/VIC909/2020|EPI_ISL_426880|2020-03-23
>hCoV-19/Australia/VIC912/2020|EPI_ISL_426881|2020-03-24
>hCoV-19/Australia/VIC913/2020|EPI_ISL_426882|2020-03-24
>hCoV-19/Czech Republic/IAB_1/2020|EPI_ISL_426883|2020-03-27
>hCoV-19/Czech Republic/IAB_4/2020|EPI_ISL_426884|2020-03-27
>hCoV-19/Czech Republic/IAB_8/2020|EPI_ISL_426885|2020-03-27
>hCoV-19/Czech Republic/IAB_9/2020|EPI_ISL_426886|2020-03-28
>hCoV-19/Czech Republic/IAB_10/2020|EPI_ISL_426887|2020-03-31
>hCoV-19/Czech Republic/IAB_12/2020|EPI_ISL_426888|2020-03-31
>hCoV-19/Czech Republic/IAB_14/2020|EPI_ISL_426889|2020-04-02
>hCoV-19/Czech Republic/IAB_15/2020|EPI_ISL_426890|2020-03-26
>hCoV-19/Czech Republic/IAB_16/2020|EPI_ISL_426891|2020-03-26
>hCoV-19/Czech Republic/IAB_17/2020|EPI_ISL_426892|2020-03-27
>hCoV-19/Czech Republic/IAB_18/2020|EPI_ISL_426893|2020-03-27
>hCoV-19/Czech Republic/IAB_20/2020|EPI_ISL_426894|2020-03-27
>hCoV-19/Czech Republic/IAB_21/2020|EPI_ISL_426895|2020-03-27
>hCoV-19/Czech Republic/IAB_22/2020|EPI_ISL_426896|2020-03-28
>hCoV-19/Czech Republic/IAB_23/2020|EPI_ISL_426897|2020-03-29
>hCoV-19/Australia/NT10/2020|EPI_ISL_426898|2020-03-26
>hCoV-19/Australia/NT11/2020|EPI_ISL_426899|2020-03-27
>hCoV-19/Australia/NT12/2020|EPI_ISL_426900|2020-03-25
>hCoV-19/Australia/NT13/2020|EPI_ISL_426901|2020-03-25
>hCoV-19/Australia/NT17/2020|EPI_ISL_426904|2020-03-24
>hCoV-19/Australia/VIC473/2020|EPI_ISL_426906|2020-03-28
>hCoV-19/Australia/VIC475/2020|EPI_ISL_426907|2020-03-28
>hCoV-19/Australia/VIC478/2020|EPI_ISL_426910|2020-03-28
>hCoV-19/Spain/Valencia105/2020|EPI_ISL_436200|2020-03-18
>hCoV-19/Spain/Valencia106/2020|EPI_ISL_436201|2020-03-18
>hCoV-19/Spain/Valencia107/2020|EPI_ISL_436202|2020-03-18
>hCoV-19/Spain/Valencia108/2020|EPI_ISL_436203|2020-03-18
>hCoV-19/Spain/Valencia110/2020|EPI_ISL_436205|2020-03-22
>hCoV-19/Spain/Valencia111/2020|EPI_ISL_436206|2020-03-22
>hCoV-19/Spain/Valencia112/2020|EPI_ISL_436207|2020-03-22
>hCoV-19/Spain/Valencia114/2020|EPI_ISL_436209|2020-03-22
>hCoV-19/Spain/Valencia115/2020|EPI_ISL_436210|2020-03-12
>hCoV-19/Spain/Valencia116/2020|EPI_ISL_436211|2020-03-12
>hCoV-19/Spain/Valencia117/2020|EPI_ISL_436212|2020-03-13
>hCoV-19/Spain/Valencia118/2020|EPI_ISL_436213|2020-03-13
>hCoV-19/Spain/Valencia119/2020|EPI_ISL_436214|2020-03-13
>hCoV-19/Spain/Valencia121/2020|EPI_ISL_436216|2020-03-13
>hCoV-19/Spain/Valencia122/2020|EPI_ISL_436217|2020-03-13
>hCoV-19/Spain/Valencia124/2020|EPI_ISL_436219|2020-03-14
>hCoV-19/Spain/Valencia125/2020|EPI_ISL_436220|2020-03-14
>hCoV-19/Spain/Valencia128/2020|EPI_ISL_436223|2020-03-14
>hCoV-19/Spain/Valencia129/2020|EPI_ISL_436224|2020-03-15
>hCoV-19/Spain/Valencia130/2020|EPI_ISL_436225|2020-03-16
>hCoV-19/Spain/Valencia132/2020|EPI_ISL_436227|2020-03-18
>hCoV-19/Spain/Valencia134/2020|EPI_ISL_436229|2020-03-18
>hCoV-19/Spain/Valencia135/2020|EPI_ISL_436230|2020-03-18
>hCoV-19/Spain/Valencia136/2020|EPI_ISL_436231|2020-03-18
>hCoV-19/Spain/Valencia138/2020|EPI_ISL_436233|2020-03-18
>hCoV-19/Spain/Valencia139/2020|EPI_ISL_436234|2020-03-18
>hCoV-19/Spain/Valencia140/2020|EPI_ISL_436235|2020-03-18
>hCoV-19/Spain/Valencia141/2020|EPI_ISL_436236|2020-03-18
>hCoV-19/Spain/Valencia142/2020|EPI_ISL_436237|2020-03-18
>hCoV-19/Spain/Valencia143/2020|EPI_ISL_436238|2020-03-18
>hCoV-19/Spain/Valencia144/2020|EPI_ISL_436239|2020-03-18
>hCoV-19/Spain/Valencia166/2020|EPI_ISL_436261|2020-03-19
>hCoV-19/Spain/Valencia167/2020|EPI_ISL_436262|2020-03-19
>hCoV-19/Spain/Valencia168/2020|EPI_ISL_436263|2020-03-20
>hCoV-19/Spain/Valencia169/2020|EPI_ISL_436264|2020-03-20
>hCoV-19/Spain/Valencia170/2020|EPI_ISL_436265|2020-03-20
>hCoV-19/Spain/Valencia171/2020|EPI_ISL_436266|2020-03-20
>hCoV-19/Spain/Valencia172/2020|EPI_ISL_436267|2020-03-20
>hCoV-19/Spain/Valencia173/2020|EPI_ISL_436268|2020-03-20
>hCoV-19/Spain/Valencia174/2020|EPI_ISL_436269|2020-03-20
>hCoV-19/Spain/Valencia177/2020|EPI_ISL_436272|2020-03-19
>hCoV-19/Spain/Valencia187/2020|EPI_ISL_436282|2020-03-25
>hCoV-19/Spain/Valencia188/2020|EPI_ISL_436283|2020-03-17
>hCoV-19/Spain/Valencia189/2020|EPI_ISL_436284|2020-03-26
>hCoV-19/Spain/Valencia190/2020|EPI_ISL_436285|2020-03-24
>hCoV-19/Spain/Valencia192/2020|EPI_ISL_436287|2020-03-24
>hCoV-19/Spain/Valencia193/2020|EPI_ISL_436288|2020-03-26
>hCoV-19/Spain/Valencia195/2020|EPI_ISL_436290|2020-03-13
>hCoV-19/Spain/Valencia196/2020|EPI_ISL_436291|2020-03-16
>hCoV-19/Spain/Valencia197/2020|EPI_ISL_436292|2020-03-13
>hCoV-19/Spain/Valencia200/2020|EPI_ISL_436295|2020-03-12
>hCoV-19/Spain/Valencia202/2020|EPI_ISL_436297|2020-03-25
>hCoV-19/Scotland/CVR1951/2020|EPI_ISL_438860|2020-04-07
>hCoV-19/Scotland/CVR1997/2020|EPI_ISL_438868|2020-04-09
>hCoV-19/Scotland/CVR2124/2020|EPI_ISL_438875|2020-04-10
>hCoV-19/Scotland/CVR2153/2020|EPI_ISL_438877|2020-04-11
>hCoV-19/Scotland/CVR2215/2020|EPI_ISL_438879|2020-04-12
>hCoV-19/Scotland/CVR226/2020|EPI_ISL_438883|2020-03-18
>hCoV-19/Scotland/CVR2260/2020|EPI_ISL_438884|2020-04-11
>hCoV-19/Scotland/CVR234/2020|EPI_ISL_438889|2020-03-19
>hCoV-19/Scotland/CVR2347/2020|EPI_ISL_438890|2020-04-13
>hCoV-19/Scotland/CVR2349/2020|EPI_ISL_438891|2020-04-13
>hCoV-19/Scotland/CVR2357/2020|EPI_ISL_438892|2020-04-13
>hCoV-19/Scotland/CVR2367/2020|EPI_ISL_438893|2020-04-14
>hCoV-19/Scotland/CVR2372/2020|EPI_ISL_438894|2020-04-13
>hCoV-19/Scotland/CVR2378/2020|EPI_ISL_438895|2020-04-13
>hCoV-19/Scotland/CVR238/2020|EPI_ISL_438896|2020-03-19
>hCoV-19/Scotland/CVR2860/2020|EPI_ISL_448200|2020-04-21
>hCoV-19/Scotland/CVR2877/2020|EPI_ISL_448201|2020-04-21
>hCoV-19/Scotland/CVR2888/2020|EPI_ISL_448204|2020-04-21
>hCoV-19/Scotland/CVR2893/2020|EPI_ISL_448205|2020-04-21
>hCoV-19/Scotland/CVR2930/2020|EPI_ISL_448206|2020-04-22
>hCoV-19/Scotland/CVR2932/2020|EPI_ISL_448207|2020-04-22
>hCoV-19/Scotland/CVR2944/2020|EPI_ISL_448209|2020-04-22
>hCoV-19/Scotland/CVR2970/2020|EPI_ISL_448210|2020-04-22
>hCoV-19/Scotland/CVR2971/2020|EPI_ISL_448211|2020-04-22
>hCoV-19/Scotland/CVR2972/2020|EPI_ISL_448212|2020-04-22
>hCoV-19/Scotland/CVR2973/2020|EPI_ISL_448213|2020-04-22
>hCoV-19/Scotland/CVR2974/2020|EPI_ISL_448214|2020-04-22
>hCoV-19/Scotland/CVR2975/2020|EPI_ISL_448215|2020-04-22
>hCoV-19/Scotland/CVR2976/2020|EPI_ISL_448216|2020-04-22
>hCoV-19/Scotland/CVR2977/2020|EPI_ISL_448217|2020-04-22
>hCoV-19/Scotland/CVR2978/2020|EPI_ISL_448218|2020-04-22
>hCoV-19/England/NORW-E8842/2020|EPI_ISL_448240|2020
>hCoV-19/England/NORW-E8851/2020|EPI_ISL_448241|2020
>hCoV-19/England/NORW-E888E/2020|EPI_ISL_448242|2020-04-12
>hCoV-19/England/NORW-E889D/2020|EPI_ISL_448243|2020-04-11
>hCoV-19/England/NORW-E88AC/2020|EPI_ISL_448244|2020-04-11
>hCoV-19/England/NORW-E88BB/2020|EPI_ISL_448245|2020-04-15
>hCoV-19/England/NORW-E88CA/2020|EPI_ISL_448246|2020-04-11
>hCoV-19/England/NORW-E88D9/2020|EPI_ISL_448247|2020
>hCoV-19/England/NORW-E88E8/2020|EPI_ISL_448248|2020-04-11
>hCoV-19/England/NORW-E8921/2020|EPI_ISL_448250|2020
>hCoV-19/England/NORW-E8930/2020|EPI_ISL_448251|2020-04-11
>hCoV-19/England/NORW-E895E/2020|EPI_ISL_448253|2020
>hCoV-19/England/NORW-E896D/2020|EPI_ISL_448254|2020-04-11
>hCoV-19/England/NORW-E898B/2020|EPI_ISL_448256|2020-04-11
>hCoV-19/England/NORW-E89C7/2020|EPI_ISL_448259|2020-04-11
>hCoV-19/England/NORW-E89D6/2020|EPI_ISL_448260|2020
>hCoV-19/England/NORW-E89E5/2020|EPI_ISL_448261|2020
>hCoV-19/England/NORW-E89F4/2020|EPI_ISL_448262|2020-04-11
>hCoV-19/England/NORW-E8A00/2020|EPI_ISL_448263|2020
>hCoV-19/England/NORW-E8A1F/2020|EPI_ISL_448264|2020
>hCoV-19/England/NORW-E8A2E/2020|EPI_ISL_448265|2020-04-12
>hCoV-19/England/NORW-E8A3D/2020|EPI_ISL_448266|2020-04-11
>hCoV-19/England/NORW-E8A4C/2020|EPI_ISL_448267|2020-04-11
>hCoV-19/England/NORW-E8A5B/2020|EPI_ISL_448268|2020-04-15
>hCoV-19/England/NORW-E8A6A/2020|EPI_ISL_448269|2020-04-13
>hCoV-19/England/NORW-E8A79/2020|EPI_ISL_448270|2020-04-12
>hCoV-19/England/NORW-E8A97/2020|EPI_ISL_448272|2020-04-15
>hCoV-19/England/NORW-E8AB5/2020|EPI_ISL_448274|2020-04-13
>hCoV-19/England/NORW-E8AD3/2020|EPI_ISL_448276|2020-04-13
>hCoV-19/England/NORW-E8AE2/2020|EPI_ISL_448277|2020-04-15
>hCoV-19/England/NORW-E8AF1/2020|EPI_ISL_448278|2020-04-13
>hCoV-19/England/NORW-E8B0D/2020|EPI_ISL_448279|2020-04-13
>hCoV-19/England/NORW-E8B1C/2020|EPI_ISL_448280|2020-04-13
>hCoV-19/England/NORW-E8B3A/2020|EPI_ISL_448281|2020-04-15
>hCoV-19/England/NORW-E8B58/2020|EPI_ISL_448282|2020-04-13
>hCoV-19/England/NORW-E8B85/2020|EPI_ISL_448283|2020-04-13
>hCoV-19/England/NORW-E8BA3/2020|EPI_ISL_448285|2020-04-12
>hCoV-19/England/NORW-E8BB2/2020|EPI_ISL_448286|2020-04-13
>hCoV-19/England/NORW-E8BC1/2020|EPI_ISL_448287|2020-04-13
>hCoV-19/England/NORW-E8BD0/2020|EPI_ISL_448288|2020-04-14
>hCoV-19/England/NORW-E8BFE/2020|EPI_ISL_448290|2020-04-14
>hCoV-19/England/NORW-E8C0A/2020|EPI_ISL_448291|2020-04-14
>hCoV-19/England/NORW-E8C37/2020|EPI_ISL_448292|2020-04-13
>hCoV-19/England/NORW-E8C64/2020|EPI_ISL_448293|2020-04-13
>hCoV-19/England/NORW-E8C73/2020|EPI_ISL_448294|2020-04-12
>hCoV-19/England/NORW-E8C91/2020|EPI_ISL_448296|2020-04-13
>hCoV-19/England/NORW-E8CA0/2020|EPI_ISL_448297|2020-04-14
>hCoV-19/England/NORW-E8CBF/2020|EPI_ISL_448298|2020-04-13
>hCoV-19/England/NORW-E8CCE/2020|EPI_ISL_448299|2020-04-15
>hCoV-19/Switzerland/101155/2020|EPI_ISL_451821|2020-03-31
>hCoV-19/Switzerland/101156/2020|EPI_ISL_451822|2020-03-31
>hCoV-19/Switzerland/101157/2020|EPI_ISL_451823|2020-03-31
>hCoV-19/Switzerland/101158/2020|EPI_ISL_451824|2020-03-31
>hCoV-19/Switzerland/101160/2020|EPI_ISL_451826|2020-03-31
>hCoV-19/Switzerland/101161/2020|EPI_ISL_451827|2020-03-31
>hCoV-19/Switzerland/101165/2020|EPI_ISL_451829|2020-03-31
>hCoV-19/Switzerland/101166/2020|EPI_ISL_451830|2020-03-31
>hCoV-19/Switzerland/101167/2020|EPI_ISL_451831|2020-03-31
>hCoV-19/Switzerland/101168/2020|EPI_ISL_451832|2020-03-31
>hCoV-19/Switzerland/101170/2020|EPI_ISL_451833|2020-03-31
>hCoV-19/Switzerland/101171/2020|EPI_ISL_451834|2020-03-31
>hCoV-19/Switzerland/101172/2020|EPI_ISL_451835|2020-03-31
>hCoV-19/Switzerland/101174/2020|EPI_ISL_451837|2020-03-31
>hCoV-19/Switzerland/101175/2020|EPI_ISL_451838|2020-03-31
>hCoV-19/Switzerland/101177/2020|EPI_ISL_451839|2020-03-31
>hCoV-19/Switzerland/101178/2020|EPI_ISL_451840|2020-03-31
>hCoV-19/Switzerland/101180/2020|EPI_ISL_451842|2020-03-31
>hCoV-19/Switzerland/101181/2020|EPI_ISL_451843|2020-03-31
>hCoV-19/Switzerland/101182/2020|EPI_ISL_451844|2020-03-31
>hCoV-19/Switzerland/101186/2020|EPI_ISL_451848|2020-03-31
>hCoV-19/Switzerland/101187/2020|EPI_ISL_451849|2020-03-31
>hCoV-19/Switzerland/101188/2020|EPI_ISL_451850|2020-03-31
>hCoV-19/Switzerland/101189/2020|EPI_ISL_451851|2020-03-31
>hCoV-19/Switzerland/101190/2020|EPI_ISL_451852|2020-03-31
>hCoV-19/Switzerland/101191/2020|EPI_ISL_451853|2020-03-31
>hCoV-19/Switzerland/101192/2020|EPI_ISL_451854|2020-03-31
>hCoV-19/Switzerland/101193/2020|EPI_ISL_451855|2020-03-31
>hCoV-19/Switzerland/110430/2020|EPI_ISL_451859|2020-04-07
>hCoV-19/Switzerland/110466/2020|EPI_ISL_451884|2020-04-06
>hCoV-19/Switzerland/110467/2020|EPI_ISL_451885|2020-04-06
>hCoV-19/Switzerland/110468/2020|EPI_ISL_451886|2020-04-06
>hCoV-19/Switzerland/110469/2020|EPI_ISL_451887|2020-04-06
>hCoV-19/Switzerland/110470/2020|EPI_ISL_451888|2020-04-06
>hCoV-19/Switzerland/110474/2020|EPI_ISL_451889|2020-04-06
>hCoV-19/Switzerland/110479/2020|EPI_ISL_451891|2020-04-06
>hCoV-19/Switzerland/110480/2020|EPI_ISL_451892|2020-04-07
>hCoV-19/Switzerland/110482/2020|EPI_ISL_451894|2020-04-07
>hCoV-19/USA/WA-UW-1723/2020|EPI_ISL_424200|2020-03-20
>hCoV-19/USA/WA-UW-1651/2020|EPI_ISL_424202|2020-03-20
>hCoV-19/USA/WA-UW-1652/2020|EPI_ISL_424203|2020-03-20
>hCoV-19/USA/WA-UW-1698/2020|EPI_ISL_424204|2020-03-20
>hCoV-19/USA/WA-UW-1697/2020|EPI_ISL_424205|2020-03-20
>hCoV-19/USA/WA-UW-1716/2020|EPI_ISL_424207|2020-03-20
>hCoV-19/USA/WA-UW-1712/2020|EPI_ISL_424208|2020-03-20
>hCoV-19/USA/WA-UW-1765/2020|EPI_ISL_424209|2020-03-20
>hCoV-19/USA/WA-UW-1718/2020|EPI_ISL_424210|2020-03-20
>hCoV-19/USA/WA-UW-1689/2020|EPI_ISL_424211|2020-03-19
>hCoV-19/USA/WA-UW-1715/2020|EPI_ISL_424212|2020-03-19
>hCoV-19/USA/WA-UW-1670/2020|EPI_ISL_424213|2020-03-20
>hCoV-19/USA/WA-UW-1677/2020|EPI_ISL_424214|2020-03-20
>hCoV-19/USA/WA-UW-1680/2020|EPI_ISL_424215|2020-03-20
>hCoV-19/USA/WA-UW-1690/2020|EPI_ISL_424216|2020-03-19
>hCoV-19/USA/WA-UW-1868/2020|EPI_ISL_424280|2020-03-23
>hCoV-19/USA/WA-UW-1864/2020|EPI_ISL_424281|2020-03-23
>hCoV-19/USA/WA-UW-1835/2020|EPI_ISL_424282|2020-03-23
>hCoV-19/USA/WA-UW-1863/2020|EPI_ISL_424284|2020-03-23
>hCoV-19/USA/OR-UW-1851/2020|EPI_ISL_424285|2020-03-21
>hCoV-19/USA/OR-UW-1849/2020|EPI_ISL_424286|2020-03-20
>hCoV-19/USA/WA-UW-1843/2020|EPI_ISL_424287|2020-03-23
>hCoV-19/USA/WA-UW-1846/2020|EPI_ISL_424288|2020-03-22
>hCoV-19/USA/WA-UW-1860/2020|EPI_ISL_424289|2020-03-23
>hCoV-19/USA/WA-UW-1853/2020|EPI_ISL_424290|2020-03-23
>hCoV-19/USA/WA-UW-1854/2020|EPI_ISL_424291|2020-03-23
>hCoV-19/USA/WA-UW-1855/2020|EPI_ISL_424292|2020-03-23
>hCoV-19/USA/WA-UW-1870/2020|EPI_ISL_424293|2020-03-23
>hCoV-19/USA/WA-UW-1872/2020|EPI_ISL_424294|2020-03-23
>hCoV-19/USA/WA-UW-1905/2020|EPI_ISL_424295|2020-03-23
>hCoV-19/USA/WA-UW-1919/2020|EPI_ISL_424296|2020-03-23
>hCoV-19/USA/WA-UW-1913/2020|EPI_ISL_424297|2020-03-23
>hCoV-19/USA/WA-UW-1920/2020|EPI_ISL_424298|2020-03-23
>hCoV-19/USA/WA-UW-1904/2020|EPI_ISL_424299|2020-03-23
>hCoV-19/USA/WA-UW-1986/2020|EPI_ISL_424338|2020-03-24
>hCoV-19/USA/WA-UW-2016/2020|EPI_ISL_424339|2020-03-24
>hCoV-19/USA/WA-UW-2009/2020|EPI_ISL_424340|2020-03-24
>hCoV-19/USA/WA-UW-2008/2020|EPI_ISL_424341|2020-03-24
>hCoV-19/Italy/INMI8/2020|EPI_ISL_424342|2020-03-07
>hCoV-19/Italy/INMI9/2020|EPI_ISL_424343|2020-03-23
>hCoV-19/Italy/INMI10/2020|EPI_ISL_424344|2020-03-04
>hCoV-19/Mexico/CDMX-INER_01/2020|EPI_ISL_424345|2020-03-12
>hCoV-19/USA/AK-PHL037/2020|EPI_ISL_424346|2020-03-21
>hCoV-19/USA/AK-PHL077/2020|EPI_ISL_424347|2020-03-29
>hCoV-19/Iran/HGRC-01-IPI-8206/2020|EPI_ISL_424349|2020-03-09
>hCoV-19/Fuyang/FY002/2020|EPI_ISL_424352|2020-03-10
>hCoV-19/USA/NC_200173/2020|EPI_ISL_424353|2020-04-02
>hCoV-19/USA/NC_200189/2020|EPI_ISL_424354|2020-04
>hCoV-19/Beijing/Wuhan_IME-BJ01/2020|EPI_ISL_424355|2020-01-24
>hCoV-19/Beijing/Wuhan_IME-BJ02/2020|EPI_ISL_424356|2020-01-25
>hCoV-19/Beijing/Wuhan_IME-BJ03/2020|EPI_ISL_424357|2020-01-28
>hCoV-19/Beijing/Wuhan_IME-BJ04/2020|EPI_ISL_424358|2020-01-28
>hCoV-19/Beijing/Wuhan_IME-BJ05/2020|EPI_ISL_424359|2020-01-27
>hCoV-19/Iceland/353/2020|EPI_ISL_424377|2020-03-18
>hCoV-19/Iceland/355/2020|EPI_ISL_424379|2020-03-19
>hCoV-19/Australia/VIC534/2020|EPI_ISL_426800|2020-03-25
>hCoV-19/Australia/VIC535/2020|EPI_ISL_426801|2020-03-25
>hCoV-19/Australia/VIC536/2020|EPI_ISL_426802|2020-03-24
>hCoV-19/Australia/VIC537/2020|EPI_ISL_426803|2020-03-24
>hCoV-19/Australia/VIC538/2020|EPI_ISL_426804|2020-03-23
>hCoV-19/Australia/VIC540/2020|EPI_ISL_426805|2020-03-24
>hCoV-19/Australia/VIC541/2020|EPI_ISL_426806|2020-03-24
>hCoV-19/Australia/VIC544/2020|EPI_ISL_426807|2020-03-23
>hCoV-19/Australia/VIC546/2020|EPI_ISL_426809|2020-03-24
>hCoV-19/Australia/VIC547/2020|EPI_ISL_426810|2020-03-25
>hCoV-19/Australia/VIC548/2020|EPI_ISL_426811|2020-03-25
>hCoV-19/Australia/VIC549/2020|EPI_ISL_426812|2020-03-23
>hCoV-19/Australia/VIC551/2020|EPI_ISL_426813|2020-03-25
>hCoV-19/Australia/VIC555/2020|EPI_ISL_426816|2020-03-25
>hCoV-19/Australia/VIC556/2020|EPI_ISL_426817|2020-03-25
>hCoV-19/Australia/VIC558/2020|EPI_ISL_426819|2020-03-25
>hCoV-19/Australia/VIC560/2020|EPI_ISL_426821|2020-03-25
>hCoV-19/Australia/VIC561/2020|EPI_ISL_426822|2020-03-25
>hCoV-19/Australia/VIC563/2020|EPI_ISL_426824|2020-03-24
>hCoV-19/Australia/VIC565/2020|EPI_ISL_426825|2020-03-25
>hCoV-19/Australia/VIC566/2020|EPI_ISL_426826|2020-03-25
>hCoV-19/Australia/VIC567/2020|EPI_ISL_426827|2020-03-25
>hCoV-19/Australia/VIC568/2020|EPI_ISL_426828|2020-03-25
>hCoV-19/Australia/VIC571/2020|EPI_ISL_426831|2020-03-25
>hCoV-19/Australia/VIC572/2020|EPI_ISL_426832|2020-03-25
>hCoV-19/Australia/VIC574/2020|EPI_ISL_426833|2020-03-26
>hCoV-19/Australia/VIC576/2020|EPI_ISL_426835|2020-03-26
>hCoV-19/Australia/VIC578/2020|EPI_ISL_426836|2020-03-26
>hCoV-19/Australia/VIC582/2020|EPI_ISL_426839|2020-03-25
>hCoV-19/Australia/VIC583/2020|EPI_ISL_426840|2020-03-25
>hCoV-19/Australia/VIC584/2020|EPI_ISL_426841|2020-03-25
>hCoV-19/Australia/VIC585/2020|EPI_ISL_426842|2020-03-25
>hCoV-19/Australia/VIC587/2020|EPI_ISL_426844|2020-03-25
>hCoV-19/Australia/VIC589/2020|EPI_ISL_426846|2020-03-22
>hCoV-19/Australia/VIC590/2020|EPI_ISL_426847|2020-03-22
>hCoV-19/Australia/VIC591/2020|EPI_ISL_426848|2020-03-22
>hCoV-19/Australia/VIC593/2020|EPI_ISL_426850|2020-03-23
>hCoV-19/Australia/VIC594/2020|EPI_ISL_426851|2020-03-25
>hCoV-19/Australia/VIC595/2020|EPI_ISL_426852|2020-03-25
>hCoV-19/Australia/VIC596/2020|EPI_ISL_426853|2020-03-25
>hCoV-19/Australia/VIC597/2020|EPI_ISL_426854|2020-03-25
>hCoV-19/Australia/VIC598/2020|EPI_ISL_426855|2020-03-25
>hCoV-19/Australia/VIC599/2020|EPI_ISL_426856|2020-03-25
>hCoV-19/Australia/VIC603/2020|EPI_ISL_426858|2020-03-26
>hCoV-19/Australia/VIC605/2020|EPI_ISL_426860|2020-03-27
>hCoV-19/Australia/VIC606/2020|EPI_ISL_426861|2020-03-27
>hCoV-19/Australia/VIC607/2020|EPI_ISL_426862|2020-03-27
>hCoV-19/Australia/VIC610/2020|EPI_ISL_426864|2020-03-26
>hCoV-19/Australia/VIC611/2020|EPI_ISL_426865|2020-03-27
>hCoV-19/Australia/VIC612/2020|EPI_ISL_426866|2020-03-26
>hCoV-19/Australia/VIC615/2020|EPI_ISL_426870|2020-03-28
>hCoV-19/Australia/VIC617/2020|EPI_ISL_426872|2020-03-26
>hCoV-19/Australia/VIC629/2020|EPI_ISL_426873|2020-03-25
>hCoV-19/Australia/VIC630/2020|EPI_ISL_426874|2020-03-26
>hCoV-19/Australia/VIC633/2020|EPI_ISL_426875|2020-03-27
>hCoV-19/Australia/VIC635/2020|EPI_ISL_426876|2020-03-28
>hCoV-19/Australia/VIC636/2020|EPI_ISL_426877|2020-03-28
>hCoV-19/Australia/VIC701/2020|EPI_ISL_426878|2020-03-21
>hCoV-19/Spain/Valencia145/2020|EPI_ISL_436240|2020-03-18
>hCoV-19/Spain/Valencia146/2020|EPI_ISL_436241|2020-03-18
>hCoV-19/Spain/Valencia147/2020|EPI_ISL_436242|2020-03-18
>hCoV-19/Spain/Valencia149/2020|EPI_ISL_436244|2020-03-19
>hCoV-19/Spain/Valencia150/2020|EPI_ISL_436245|2020-03-19
>hCoV-19/Spain/Valencia151/2020|EPI_ISL_436246|2020-03-19
>hCoV-19/Spain/Valencia152/2020|EPI_ISL_436247|2020-03-19
>hCoV-19/Spain/Valencia153/2020|EPI_ISL_436248|2020-03-19
>hCoV-19/Spain/Valencia154/2020|EPI_ISL_436249|2020-03-19
>hCoV-19/Spain/Valencia155/2020|EPI_ISL_436250|2020-03-19
>hCoV-19/Spain/Valencia156/2020|EPI_ISL_436251|2020-03-19
>hCoV-19/Spain/Valencia157/2020|EPI_ISL_436252|2020-03-19
>hCoV-19/Spain/Valencia159/2020|EPI_ISL_436254|2020-03-19
>hCoV-19/Spain/Valencia160/2020|EPI_ISL_436255|2020-03-19
>hCoV-19/Spain/Valencia163/2020|EPI_ISL_436258|2020-03-19
>hCoV-19/Spain/Valencia176/2020|EPI_ISL_436271|2020-03-19
>hCoV-19/Spain/Valencia246/2020|EPI_ISL_436341|2020-03-29
>hCoV-19/Spain/Valencia247/2020|EPI_ISL_436342|2020-03-25
>hCoV-19/Spain/Valencia250/2020|EPI_ISL_436345|2020-03-25
>hCoV-19/Spain/Valencia251/2020|EPI_ISL_436346|2020-03-27
>hCoV-19/Spain/Valencia253/2020|EPI_ISL_436348|2020-03-26
>hCoV-19/Spain/Valencia258/2020|EPI_ISL_436353|2020-03-25
>hCoV-19/Spain/Valencia260/2020|EPI_ISL_436355|2020-03-26
>hCoV-19/Spain/Valencia261/2020|EPI_ISL_436356|2020-03-26
>hCoV-19/Scotland/CVR1427/2020|EPI_ISL_438806|2020-04-02
>hCoV-19/Scotland/CVR1448/2020|EPI_ISL_438815|2020-04-01
>hCoV-19/Scotland/CVR1484/2020|EPI_ISL_438824|2020-04-02
>hCoV-19/Scotland/CVR1496/2020|EPI_ISL_438827|2020-04-02
>hCoV-19/Scotland/CVR1499/2020|EPI_ISL_438829|2020-04-03
>hCoV-19/Scotland/CVR1504/2020|EPI_ISL_438830|2020-04-03
>hCoV-19/Scotland/CVR1506/2020|EPI_ISL_438831|2020-04-03
>hCoV-19/Scotland/CVR1533/2020|EPI_ISL_438836|2020-04-03
>hCoV-19/Scotland/CVR1537/2020|EPI_ISL_438837|2020-04-04
>hCoV-19/Scotland/CVR1557/2020|EPI_ISL_438839|2020-04-03
>hCoV-19/Scotland/CVR1560/2020|EPI_ISL_438840|2020-04-04
>hCoV-19/Scotland/CVR1573/2020|EPI_ISL_438841|2020-04-04
>hCoV-19/Scotland/CVR1579/2020|EPI_ISL_438842|2020-04-04
>hCoV-19/Scotland/CVR1615/2020|EPI_ISL_438844|2020-04-05
>hCoV-19/Scotland/CVR1692/2020|EPI_ISL_438845|2020-04-05
>hCoV-19/Scotland/CVR1816/2020|EPI_ISL_438849|2020-04-07
>hCoV-19/Scotland/CVR1843/2020|EPI_ISL_438850|2020-04-06
>hCoV-19/Scotland/CVR2979/2020|EPI_ISL_448219|2020-04-22
>hCoV-19/Scotland/CVR2980/2020|EPI_ISL_448220|2020-04-22
>hCoV-19/Scotland/CVR2981/2020|EPI_ISL_448221|2020-04-23
>hCoV-19/Vietnam/IBT-14Mar/2020|EPI_ISL_448222|2020-03-15
>hCoV-19/England/NORW-E86C0/2020|EPI_ISL_448223|2020-04-18
>hCoV-19/England/NORW-E86DF/2020|EPI_ISL_448224|2020-04-17
>hCoV-19/England/NORW-E86FD/2020|EPI_ISL_448225|2020-04-17
>hCoV-19/England/NORW-E8709/2020|EPI_ISL_448226|2020-04-18
>hCoV-19/England/NORW-E8718/2020|EPI_ISL_448227|2020-04-16
>hCoV-19/England/NORW-E8727/2020|EPI_ISL_448228|2020
>hCoV-19/England/NORW-E8745/2020|EPI_ISL_448229|2020-04-15
>hCoV-19/England/NORW-E8772/2020|EPI_ISL_448230|2020-04-13
>hCoV-19/England/NORW-E8790/2020|EPI_ISL_448232|2020-04-11
>hCoV-19/England/NORW-E87BE/2020|EPI_ISL_448233|2020-04-11
>hCoV-19/England/NORW-E87CD/2020|EPI_ISL_448234|2020-04-12
>hCoV-19/England/NORW-E87DC/2020|EPI_ISL_448235|2020-04-11
>hCoV-19/England/NORW-E8824/2020|EPI_ISL_448238|2020-04-11
>hCoV-19/England/NORW-E8833/2020|EPI_ISL_448239|2020-04-15
>hCoV-19/England/NORW-E8D34/2020|EPI_ISL_448305|2020-04-13
>hCoV-19/England/NORW-E8D52/2020|EPI_ISL_448306|2020
>hCoV-19/England/NORW-E954A/2020|EPI_ISL_448320|2020-04-22
>hCoV-19/England/NORW-E95A4/2020|EPI_ISL_448321|2020-04-22
>hCoV-19/England/NORW-E960B/2020|EPI_ISL_448322|2020-04-22
>hCoV-19/England/NORW-E961A/2020|EPI_ISL_448323|2020-04-22
>hCoV-19/England/NORW-E9665/2020|EPI_ISL_448324|2020-04-22
>hCoV-19/England/NORW-E9683/2020|EPI_ISL_448325|2020-04-22
>hCoV-19/England/NORW-E96B0/2020|EPI_ISL_448326|2020-04-22
>hCoV-19/England/NORW-E96CF/2020|EPI_ISL_448327|2020-04-22
>hCoV-19/England/NORW-E9744/2020|EPI_ISL_448328|2020-04-23
>hCoV-19/England/NORW-E9753/2020|EPI_ISL_448329|2020-04-23
>hCoV-19/England/NORW-E9762/2020|EPI_ISL_448330|2020-04-23
>hCoV-19/England/NORW-E97AE/2020|EPI_ISL_448331|2020-04-23
>hCoV-19/England/NORW-E97BD/2020|EPI_ISL_448332|2020-04-23
>hCoV-19/England/NORW-E9805/2020|EPI_ISL_448335|2020-04-23
>hCoV-19/England/NORW-E9814/2020|EPI_ISL_448336|2020-04-23
>hCoV-19/England/NORW-E9841/2020|EPI_ISL_448338|2020-04-23
>hCoV-19/England/NORW-E987E/2020|EPI_ISL_448339|2020-04-23
>hCoV-19/England/NORW-E9EF4/2020|EPI_ISL_448380|2020-05-02
>hCoV-19/England/NORW-E9FE2/2020|EPI_ISL_448383|2020-05-02
>hCoV-19/England/NORW-E9FF1/2020|EPI_ISL_448384|2020-05-03
>hCoV-19/England/NORW-EA00C/2020|EPI_ISL_448385|2020-05-03
>hCoV-19/England/NORW-EA057/2020|EPI_ISL_448387|2020-05-03
>hCoV-19/England/NORW-EA109/2020|EPI_ISL_448388|2020-05-02
>hCoV-19/England/NOTT-110AFF/2020|EPI_ISL_448389|2020-04-30
>hCoV-19/England/NOTT-110B74/2020|EPI_ISL_448391|2020-05-01
>hCoV-19/England/NOTT-110C26/2020|EPI_ISL_448395|2020-05-01
>hCoV-19/England/NOTT-110C44/2020|EPI_ISL_448397|2020-05-01
>hCoV-19/England/NOTT-110C62/2020|EPI_ISL_448398|2020-05-01
>hCoV-19/England/NOTT-110C71/2020|EPI_ISL_448399|2020-05-01
>hCoV-19/Switzerland/101133/2020|EPI_ISL_451800|2020-03-30
>hCoV-19/Switzerland/101134/2020|EPI_ISL_451801|2020-03-30
>hCoV-19/Switzerland/101135/2020|EPI_ISL_451802|2020-03-30
>hCoV-19/Switzerland/101136/2020|EPI_ISL_451803|2020-03-30
>hCoV-19/Switzerland/101137/2020|EPI_ISL_451804|2020-03-30
>hCoV-19/Switzerland/101138/2020|EPI_ISL_451805|2020-03-31
>hCoV-19/Switzerland/101139/2020|EPI_ISL_451806|2020-03-31
>hCoV-19/Switzerland/101140/2020|EPI_ISL_451807|2020-03-31
>hCoV-19/Switzerland/101141/2020|EPI_ISL_451808|2020-03-31
>hCoV-19/Switzerland/101142/2020|EPI_ISL_451809|2020-03-31
>hCoV-19/Switzerland/101143/2020|EPI_ISL_451810|2020-03-31
>hCoV-19/Switzerland/101144/2020|EPI_ISL_451811|2020-03-31
>hCoV-19/Switzerland/101145/2020|EPI_ISL_451812|2020-03-31
>hCoV-19/Switzerland/101146/2020|EPI_ISL_451813|2020-03-31
>hCoV-19/Switzerland/101147/2020|EPI_ISL_451814|2020-03-31
>hCoV-19/Switzerland/101149/2020|EPI_ISL_451816|2020-03-31
>hCoV-19/Switzerland/101150/2020|EPI_ISL_451817|2020-03-31
>hCoV-19/Switzerland/101151/2020|EPI_ISL_451818|2020-03-31
>hCoV-19/Switzerland/101152/2020|EPI_ISL_451819|2020-03-31
>hCoV-19/Switzerland/110436/2020|EPI_ISL_451862|2020-04-07
>hCoV-19/Switzerland/110437/2020|EPI_ISL_451863|2020-04-07
>hCoV-19/Switzerland/110439/2020|EPI_ISL_451864|2020-04-07
>hCoV-19/Switzerland/110444/2020|EPI_ISL_451867|2020-04-07
>hCoV-19/Switzerland/110448/2020|EPI_ISL_451869|2020-04-07
>hCoV-19/Switzerland/110450/2020|EPI_ISL_451870|2020-04-07
>hCoV-19/Switzerland/110451/2020|EPI_ISL_451871|2020-04-07
>hCoV-19/Switzerland/110452/2020|EPI_ISL_451872|2020-04-07
>hCoV-19/Switzerland/110453/2020|EPI_ISL_451873|2020-04-07
>hCoV-19/Switzerland/110454/2020|EPI_ISL_451874|2020-04-07
>hCoV-19/Switzerland/110455/2020|EPI_ISL_451875|2020-04-07
>hCoV-19/Switzerland/110458/2020|EPI_ISL_451877|2020-04-07
>hCoV-19/Switzerland/110459/2020|EPI_ISL_451878|2020-04-07
>hCoV-19/Switzerland/110460/2020|EPI_ISL_451879|2020-04-07
>hCoV-19/Pakistan/KHI1/2020|EPI_ISL_451958|2020-03-16
>hCoV-19/Italy/IZSPB_CL1/2020|EPI_ISL_451961|2020-03-14
>hCoV-19/Italy/IZSPB_1259/2020|EPI_ISL_451962|2020-03-20
>hCoV-19/Russia/SCPM-O-01/2020|EPI_ISL_451963|2020-03-20
>hCoV-19/Russia/SCPM-O-02/2020|EPI_ISL_451964|2020-03-22
>hCoV-19/Russia/SCPM-O-03/2020|EPI_ISL_451965|2020-03-20
>hCoV-19/Russia/SCPM-O-05/2020|EPI_ISL_451967|2020-03-21
>hCoV-19/Russia/SCPM-O-06/2020|EPI_ISL_451968|2020-03-18
>hCoV-19/Russia/SCPM-O-07/2020|EPI_ISL_451969|2020-03-22
>hCoV-19/Russia/SCPM-O-08/2020|EPI_ISL_451970|2020-03-22
>hCoV-19/Poland/PL_P10/2020|EPI_ISL_451971|2020-04-01
>hCoV-19/Poland/PL_P11/2020|EPI_ISL_451972|2020-04-02
>hCoV-19/Poland/PL_P12/2020|EPI_ISL_451973|2020-03-31
>hCoV-19/Poland/PL_P13/2020|EPI_ISL_451974|2020-04-03
>hCoV-19/Poland/PL_P14/2020|EPI_ISL_451975|2020-03-31
>hCoV-19/Poland/PL_P15/2020|EPI_ISL_451976|2020-04-07
>hCoV-19/Poland/PL_P16/2020|EPI_ISL_451977|2020-04-03
>hCoV-19/Poland/PL_P17/2020|EPI_ISL_451978|2020-04-01
>hCoV-19/Poland/PL_P18/2020|EPI_ISL_451979|2020-03-31
>hCoV-19/Poland/PL_P19/2020|EPI_ISL_451980|2020-04-02
>hCoV-19/Shandong/LY001-2/2020|EPI_ISL_414934|2020-01-21
>hCoV-19/Shandong/LY003-2/2020|EPI_ISL_414936|2020-01-23
>hCoV-19/Shandong/LY004-2/2020|EPI_ISL_414937|2020-01-26
>hCoV-19/Shandong/LY005-2/2020|EPI_ISL_414938|2020-01-24
>hCoV-19/Shandong/LY007-2/2020|EPI_ISL_414940|2020-01-25
>hCoV-19/Shandong/LY008-2/2020|EPI_ISL_414941|2020-01-30
>hCoV-19/USA/WA-UW-1879/2020|EPI_ISL_424300|2020-03-21
>hCoV-19/USA/WA-UW-1948/2020|EPI_ISL_424301|2020-03-24
>hCoV-19/USA/WA-UW-1878/2020|EPI_ISL_424302|2020-03-24
>hCoV-19/USA/WA-UW-1930/2020|EPI_ISL_424304|2020-03-24
>hCoV-19/USA/WA-UW-1877/2020|EPI_ISL_424305|2020-03-24
>hCoV-19/USA/WA-UW-1874/2020|EPI_ISL_424306|2020-03-23
>hCoV-19/USA/OR-UW-1885/2020|EPI_ISL_424307|2020-03-23
>hCoV-19/USA/OR-UW-1887/2020|EPI_ISL_424308|2020-03-22
>hCoV-19/USA/WA-UW-1881/2020|EPI_ISL_424309|2020-03-24
>hCoV-19/USA/WA-UW-1888/2020|EPI_ISL_424310|2020-03-23
>hCoV-19/USA/WA-UW-1880/2020|EPI_ISL_424311|2020-03-24
>hCoV-19/USA/WA-UW-1955/2020|EPI_ISL_424312|2020-03-24
>hCoV-19/USA/WA-UW-1956/2020|EPI_ISL_424313|2020-03-24
>hCoV-19/USA/WA-UW-1921/2020|EPI_ISL_424314|2020-03-24
>hCoV-19/USA/ID-UW-1957/2020|EPI_ISL_424315|2020-03-20
>hCoV-19/USA/WA-UW-1988/2020|EPI_ISL_424336|2020-03-24
>hCoV-19/USA/WA-UW-1977/2020|EPI_ISL_424337|2020-03-24
>hCoV-19/Beijing/Wuhan_IME-BJ07/2020|EPI_ISL_424360|2020-01-29
>hCoV-19/India/1063/2020|EPI_ISL_424361|2020-03-10
>hCoV-19/India/1135/2020|EPI_ISL_424362|2020-03-10
>hCoV-19/India/1652/2020|EPI_ISL_424363|2020-03-12
>hCoV-19/India/3118/2020|EPI_ISL_424364|2020-03-17
>hCoV-19/India/3239/2020|EPI_ISL_424365|2020-03-17
>hCoV-19/Turkey/ERAGEM-001/2020|EPI_ISL_424366|2020-03-17
>hCoV-19/Iceland/343/2020|EPI_ISL_424367|2020-03
>hCoV-19/Iceland/344/2020|EPI_ISL_424368|2020-03
>hCoV-19/Iceland/345/2020|EPI_ISL_424369|2020-03
>hCoV-19/Iceland/346/2020|EPI_ISL_424370|2020-03
>hCoV-19/Iceland/347/2020|EPI_ISL_424371|2020-03
>hCoV-19/Iceland/348/2020|EPI_ISL_424372|2020-03
>hCoV-19/Iceland/350/2020|EPI_ISL_424374|2020-03
>hCoV-19/Iceland/356/2020|EPI_ISL_424380|2020-03-19
>hCoV-19/Iceland/357/2020|EPI_ISL_424381|2020-03-19
>hCoV-19/Iceland/358/2020|EPI_ISL_424382|2020-03-19
>hCoV-19/Iceland/359/2020|EPI_ISL_424383|2020-03-19
>hCoV-19/Iceland/360/2020|EPI_ISL_424384|2020-03-19
>hCoV-19/Iceland/361/2020|EPI_ISL_424385|2020-03-19
>hCoV-19/Iceland/364/2020|EPI_ISL_424388|2020-03-19
>hCoV-19/Iceland/365/2020|EPI_ISL_424389|2020-03-19
>hCoV-19/Iceland/366/2020|EPI_ISL_424390|2020-03-19
>hCoV-19/Iceland/367/2020|EPI_ISL_424391|2020-03-19
>hCoV-19/Iceland/368/2020|EPI_ISL_424392|2020-03-19
>hCoV-19/Iceland/369/2020|EPI_ISL_424393|2020-03-19
>hCoV-19/Iceland/370/2020|EPI_ISL_424394|2020-03-19
>hCoV-19/Iceland/372/2020|EPI_ISL_424396|2020-03-19
>hCoV-19/Iceland/374/2020|EPI_ISL_424398|2020-03-19
>hCoV-19/Iceland/375/2020|EPI_ISL_424399|2020-03-19
>hCoV-19/Australia/VIC483/2020|EPI_ISL_426914|2020-03-29
>hCoV-19/Australia/VIC486/2020|EPI_ISL_426917|2020-03-29
>hCoV-19/Australia/VIC487/2020|EPI_ISL_426918|2020-03-29
>hCoV-19/Australia/VIC488/2020|EPI_ISL_426919|2020-03-29
>hCoV-19/Australia/VIC489/2020|EPI_ISL_426920|2020-03-29
>hCoV-19/Australia/VIC490/2020|EPI_ISL_426921|2020-03-30
>hCoV-19/Australia/VIC491/2020|EPI_ISL_426922|2020-03-30
>hCoV-19/Australia/VIC619/2020|EPI_ISL_426923|2020-03-28
>hCoV-19/Australia/VIC620/2020|EPI_ISL_426924|2020-03-28
>hCoV-19/Australia/VIC622/2020|EPI_ISL_426926|2020-03-29
>hCoV-19/Australia/VIC623/2020|EPI_ISL_426927|2020-03-28
>hCoV-19/Australia/VIC625/2020|EPI_ISL_426929|2020-03-28
>hCoV-19/Australia/VIC626/2020|EPI_ISL_426930|2020-03-28
>hCoV-19/Australia/VIC627/2020|EPI_ISL_426931|2020-03-29
>hCoV-19/Australia/VIC628/2020|EPI_ISL_426932|2020-03-29
>hCoV-19/Australia/VIC637/2020|EPI_ISL_426933|2020-03-28
>hCoV-19/Australia/VIC638/2020|EPI_ISL_426934|2020-03-29
>hCoV-19/Australia/VIC639/2020|EPI_ISL_426935|2020-03-29
>hCoV-19/Australia/VIC644/2020|EPI_ISL_426940|2020-03-28
>hCoV-19/Australia/VIC645/2020|EPI_ISL_426941|2020-03-28
>hCoV-19/Australia/VIC646/2020|EPI_ISL_426942|2020-03-24
>hCoV-19/Australia/VIC647/2020|EPI_ISL_426943|2020-03-28
>hCoV-19/Australia/VIC648/2020|EPI_ISL_426944|2020-03-28
>hCoV-19/Australia/VIC650/2020|EPI_ISL_426946|2020-03-28
>hCoV-19/Australia/VIC651/2020|EPI_ISL_426947|2020-03-28
>hCoV-19/Australia/VIC652/2020|EPI_ISL_426948|2020-03-28
>hCoV-19/Australia/VIC655/2020|EPI_ISL_426951|2020-03-28
>hCoV-19/Australia/VIC656/2020|EPI_ISL_426952|2020-03-28
>hCoV-19/Australia/VIC657/2020|EPI_ISL_426953|2020-03-28
>hCoV-19/Australia/VIC658/2020|EPI_ISL_426954|2020-03-28
>hCoV-19/Australia/VIC659/2020|EPI_ISL_426955|2020-03-27
>hCoV-19/Australia/VIC660/2020|EPI_ISL_426956|2020-03-28
>hCoV-19/Australia/VIC661/2020|EPI_ISL_426957|2020-03-27
>hCoV-19/Australia/VIC683/2020|EPI_ISL_426978|2020-03-29
>hCoV-19/Australia/VIC685/2020|EPI_ISL_426980|2020-03-28
>hCoV-19/Australia/VIC687/2020|EPI_ISL_426981|2020-03-29
>hCoV-19/Australia/VIC694/2020|EPI_ISL_426986|2020-03-28
>hCoV-19/Australia/VIC696/2020|EPI_ISL_426988|2020-03-28
>hCoV-19/Australia/VIC697/2020|EPI_ISL_426989|2020-03-28
>hCoV-19/Australia/VIC706/2020|EPI_ISL_426993|2020-03-30
>hCoV-19/Australia/VIC707/2020|EPI_ISL_426994|2020-03-29
>hCoV-19/Australia/VIC708/2020|EPI_ISL_426995|2020-03-29
>hCoV-19/Australia/VIC710/2020|EPI_ISL_426997|2020-03-29
>hCoV-19/Australia/VIC712/2020|EPI_ISL_426999|2020-03-29
>hCoV-19/Spain/Valencia206/2020|EPI_ISL_436301|2020-03-17
>hCoV-19/Spain/Valencia208/2020|EPI_ISL_436303|2020-03-28
>hCoV-19/Spain/Valencia209/2020|EPI_ISL_436304|2020-03-26
>hCoV-19/Spain/Valencia211/2020|EPI_ISL_436306|2020-03-28
>hCoV-19/Spain/Valencia212/2020|EPI_ISL_436307|2020-03-28
>hCoV-19/Spain/Valencia215/2020|EPI_ISL_436310|2020-03-28
>hCoV-19/Spain/Valencia216/2020|EPI_ISL_436311|2020-03-28
>hCoV-19/Spain/Valencia218/2020|EPI_ISL_436313|2020-03-25
>hCoV-19/Spain/Valencia219/2020|EPI_ISL_436314|2020-03-25
>hCoV-19/Spain/Valencia220/2020|EPI_ISL_436315|2020-03-27
>hCoV-19/Spain/Valencia221/2020|EPI_ISL_436316|2020-03-23
>hCoV-19/Spain/Valencia222/2020|EPI_ISL_436317|2020-03-26
>hCoV-19/Spain/Valencia223/2020|EPI_ISL_436318|2020-03-26
>hCoV-19/Spain/Valencia229/2020|EPI_ISL_436324|2020-03-24
>hCoV-19/Spain/Valencia230/2020|EPI_ISL_436325|2020-03-26
>hCoV-19/Spain/Valencia231/2020|EPI_ISL_436326|2020-03-26
>hCoV-19/Spain/Valencia232/2020|EPI_ISL_436327|2020-03-26
>hCoV-19/Spain/Valencia233/2020|EPI_ISL_436328|2020-03-26
>hCoV-19/Spain/Valencia234/2020|EPI_ISL_436329|2020-03-26
>hCoV-19/Spain/Valencia235/2020|EPI_ISL_436330|2020-03-26
>hCoV-19/Spain/Valencia239/2020|EPI_ISL_436334|2020-03-24
>hCoV-19/Spain/Valencia240/2020|EPI_ISL_436335|2020-03-26
>hCoV-19/Spain/Valencia241/2020|EPI_ISL_436336|2020-03-26
>hCoV-19/Spain/Valencia242/2020|EPI_ISL_436337|2020-03-26
>hCoV-19/Spain/Valencia266/2020|EPI_ISL_436361|2020-02-29
>hCoV-19/Spain/Valencia269/2020|EPI_ISL_436364|2020-03-21
>hCoV-19/Spain/Valencia270/2020|EPI_ISL_436365|2020-03-21
>hCoV-19/Spain/Valencia271/2020|EPI_ISL_436366|2020-03-21
>hCoV-19/Spain/Valencia272/2020|EPI_ISL_436367|2020-03-25
>hCoV-19/Spain/Valencia273/2020|EPI_ISL_436368|2020-03-25
>hCoV-19/Spain/Valencia274/2020|EPI_ISL_436369|2020-03-26
>hCoV-19/Spain/Valencia275/2020|EPI_ISL_436370|2020-03-26
>hCoV-19/Spain/Valencia276/2020|EPI_ISL_436371|2020-03-26
>hCoV-19/Spain/Valencia278/2020|EPI_ISL_436373|2020-03-16
>hCoV-19/Spain/Valencia279/2020|EPI_ISL_436374|2020-03-16
>hCoV-19/Spain/Valencia281/2020|EPI_ISL_436376|2020-03-16
>hCoV-19/Spain/Valencia282/2020|EPI_ISL_436377|2020-03-17
>hCoV-19/Spain/Valencia283/2020|EPI_ISL_436378|2020-03-17
>hCoV-19/Spain/Valencia284/2020|EPI_ISL_436379|2020-03-18
>hCoV-19/Spain/Valencia285/2020|EPI_ISL_436380|2020-03-18
>hCoV-19/Spain/Valencia287/2020|EPI_ISL_436382|2020-03-17
>hCoV-19/Spain/Valencia288/2020|EPI_ISL_436383|2020-03-17
>hCoV-19/Spain/Valencia289/2020|EPI_ISL_436384|2020-03-17
>hCoV-19/Spain/Valencia291/2020|EPI_ISL_436386|2020-03-17
>hCoV-19/Spain/Valencia292/2020|EPI_ISL_436387|2020-03-17
>hCoV-19/Spain/Valencia293/2020|EPI_ISL_436388|2020-03-17
>hCoV-19/Spain/Valencia294/2020|EPI_ISL_436389|2020-03-17
>hCoV-19/Spain/Valencia295/2020|EPI_ISL_436390|2020-03-17
>hCoV-19/Spain/Valencia296/2020|EPI_ISL_436391|2020-03-17
>hCoV-19/Spain/Valencia302/2020|EPI_ISL_436397|2020-03-22
>hCoV-19/Scotland/CVR2403/2020|EPI_ISL_438900|2020-04-13
>hCoV-19/Scotland/CVR2404/2020|EPI_ISL_438901|2020-04-13
>hCoV-19/Scotland/CVR2411/2020|EPI_ISL_438902|2020-04-14
>hCoV-19/Scotland/CVR2437/2020|EPI_ISL_438905|2020-04-14
>hCoV-19/Scotland/CVR2447/2020|EPI_ISL_438908|2020-04-14
>hCoV-19/Scotland/CVR2450/2020|EPI_ISL_438910|2020-04-14
>hCoV-19/Scotland/CVR2468/2020|EPI_ISL_438912|2020-04-14
>hCoV-19/Scotland/CVR247/2020|EPI_ISL_438913|2020-03-19
>hCoV-19/Scotland/CVR249/2020|EPI_ISL_438914|2020-03-19
>hCoV-19/Scotland/CVR2492/2020|EPI_ISL_438915|2020-04-15
>hCoV-19/Scotland/CVR2496/2020|EPI_ISL_438916|2020-04-14
>hCoV-19/Scotland/CVR2512/2020|EPI_ISL_438920|2020-04-15
>hCoV-19/Scotland/CVR2515/2020|EPI_ISL_438921|2020-04-15
>hCoV-19/Scotland/CVR2521/2020|EPI_ISL_438923|2020-04-15
>hCoV-19/Scotland/CVR2536/2020|EPI_ISL_438925|2020-04-16
>hCoV-19/Scotland/CVR255/2020|EPI_ISL_438926|2020-03-19
>hCoV-19/Scotland/CVR257/2020|EPI_ISL_438928|2020-03-20
>hCoV-19/Scotland/CVR2576/2020|EPI_ISL_438929|2020-04-16
>hCoV-19/Scotland/CVR258/2020|EPI_ISL_438930|2020-03-20
>hCoV-19/Scotland/CVR2611/2020|EPI_ISL_438931|2020-04-15
>hCoV-19/Scotland/CVR263/2020|EPI_ISL_438933|2020-03-20
>hCoV-19/Japan/Donner14/2020|EPI_ISL_438958|2020-04-10
>hCoV-19/Japan/Donner15/2020|EPI_ISL_438959|2020-04-10
>hCoV-19/Japan/Donner17/2020|EPI_ISL_438961|2020-04-11
>hCoV-19/Japan/Donner21/2020|EPI_ISL_438965|2020-04-14
>hCoV-19/Japan/Donner22/2020|EPI_ISL_438966|2020-04-16
>hCoV-19/Japan/Donner23/2020|EPI_ISL_438967|2020-04-16
>hCoV-19/Japan/Donner25/2020|EPI_ISL_438969|2020-04-22
>hCoV-19/Japan/Donner26/2020|EPI_ISL_438970|2020-03-25
>hCoV-19/Japan/Donner27/2020|EPI_ISL_438971|2020-04-24
>hCoV-19/Japan/Donner28/2020|EPI_ISL_438972|2020-03-27
>hCoV-19/Scotland/CVR2749/2020|EPI_ISL_438973|2020-04-18
>hCoV-19/Scotland/CVR2750/2020|EPI_ISL_438974|2020-04-18
>hCoV-19/Scotland/CVR2751/2020|EPI_ISL_438975|2020-04-18
>hCoV-19/Scotland/CVR2757/2020|EPI_ISL_438976|2020-04-20
>hCoV-19/Scotland/CVR2764/2020|EPI_ISL_438977|2020-04-20
>hCoV-19/Scotland/CVR2770/2020|EPI_ISL_438978|2020-04-20
>hCoV-19/Scotland/CVR2789/2020|EPI_ISL_438979|2020-04-18
>hCoV-19/Scotland/CVR2803/2020|EPI_ISL_438981|2020-04-21
>hCoV-19/Scotland/CVR2812/2020|EPI_ISL_438984|2020-04-21
>hCoV-19/Scotland/CVR2819/2020|EPI_ISL_438986|2020-04-20
>hCoV-19/Scotland/CVR2906/2020|EPI_ISL_438995|2020-04-22
>hCoV-19/Scotland/CVR2921/2020|EPI_ISL_438998|2020-04-22
>hCoV-19/Scotland/CVR2937/2020|EPI_ISL_438999|2020-04-22
>hCoV-19/England/NORW-E8CDD/2020|EPI_ISL_448300|2020-04-13
>hCoV-19/England/NORW-E8D61/2020|EPI_ISL_448307|2020-04-12
>hCoV-19/England/NORW-E8D70/2020|EPI_ISL_448308|2020
>hCoV-19/England/NORW-E93C8/2020|EPI_ISL_448309|2020-04-22
>hCoV-19/England/NORW-E9401/2020|EPI_ISL_448311|2020-04-23
>hCoV-19/England/NORW-E942F/2020|EPI_ISL_448312|2020-04-23
>hCoV-19/England/NORW-E944D/2020|EPI_ISL_448313|2020-04-22
>hCoV-19/England/NORW-E946B/2020|EPI_ISL_448314|2020-04-22
>hCoV-19/England/NORW-E9498/2020|EPI_ISL_448315|2020-04-22
>hCoV-19/England/NORW-E94A7/2020|EPI_ISL_448316|2020-04-22
>hCoV-19/England/NORW-E94F2/2020|EPI_ISL_448317|2020-04-23
>hCoV-19/England/NORW-E988D/2020|EPI_ISL_448340|2020-04-23
>hCoV-19/England/NORW-E98BA/2020|EPI_ISL_448341|2020-04-23
>hCoV-19/England/NORW-E98D8/2020|EPI_ISL_448342|2020-04-23
>hCoV-19/England/NORW-E994E/2020|EPI_ISL_448344|2020-04-23
>hCoV-19/England/NORW-E998A/2020|EPI_ISL_448345|2020-04-23
>hCoV-19/England/NORW-E99B7/2020|EPI_ISL_448346|2020-04-23
>hCoV-19/England/NORW-E9A0F/2020|EPI_ISL_448348|2020-04-22
>hCoV-19/England/NORW-E9AD2/2020|EPI_ISL_448350|2020-04-30
>hCoV-19/England/NORW-E9B1B/2020|EPI_ISL_448351|2020-04-30
>hCoV-19/England/NORW-E9B48/2020|EPI_ISL_448352|2020-04-30
>hCoV-19/England/NORW-E9C09/2020|EPI_ISL_448355|2020-04-30
>hCoV-19/England/NORW-E9C54/2020|EPI_ISL_448357|2020-04-30
>hCoV-19/England/NORW-E9C63/2020|EPI_ISL_448358|2020-04-30
>hCoV-19/England/NORW-E9C72/2020|EPI_ISL_448359|2020-04-30
>hCoV-19/England/NORW-E9CEB/2020|EPI_ISL_448360|2020-04-30
>hCoV-19/England/NORW-E9D06/2020|EPI_ISL_448361|2020-04-30
>hCoV-19/England/NORW-E9D42/2020|EPI_ISL_448362|2020-04-30
>hCoV-19/England/NORW-E9D60/2020|EPI_ISL_448363|2020-05-01
>hCoV-19/England/NORW-E9D7F/2020|EPI_ISL_448364|2020-05-03
>hCoV-19/England/NORW-E9D8E/2020|EPI_ISL_448365|2020-05-02
>hCoV-19/England/NORW-E9D9D/2020|EPI_ISL_448366|2020-05-03
>hCoV-19/England/NORW-E9DE8/2020|EPI_ISL_448369|2020-05-03
>hCoV-19/England/NORW-E9DF7/2020|EPI_ISL_448370|2020-05-02
>hCoV-19/England/NORW-E9E12/2020|EPI_ISL_448371|2020-05-02
>hCoV-19/England/NORW-E9E30/2020|EPI_ISL_448372|2020-05-01
>hCoV-19/England/NORW-E9E6D/2020|EPI_ISL_448374|2020-05-03
>hCoV-19/England/NORW-E9E7C/2020|EPI_ISL_448375|2020-05-01
>hCoV-19/England/NORW-E9E9A/2020|EPI_ISL_448376|2020-05-02
>hCoV-19/England/NORW-E9EA9/2020|EPI_ISL_448377|2020-05-02
>hCoV-19/England/NORW-E9ED6/2020|EPI_ISL_448379|2020-05-01
>hCoV-19/Croatia/ZG-297-20/2020|EPI_ISL_451934|2020-03-05
>hCoV-19/Belgium/20A30/2020|EPI_ISL_451935|2020-03-18
>hCoV-19/Germany/BAV-MVP0123/2020|EPI_ISL_451940|2020-03-23
>hCoV-19/Germany/BAV-MVP0124/2020|EPI_ISL_451941|2020-03-23
>hCoV-19/Belarus/ChVir2070/2020|EPI_ISL_451948|2020-03
>hCoV-19/Poland/PL_P20/2020|EPI_ISL_451981|2020-04-07
>hCoV-19/Poland/PL_P21/2020|EPI_ISL_451982|2020-03-29
>hCoV-19/Poland/PL_P22/2020|EPI_ISL_451983|2020-04-02
>hCoV-19/Poland/PL_P23/2020|EPI_ISL_451984|2020-03-29
>hCoV-19/Poland/PL_P24/2020|EPI_ISL_451985|2020-03-29
>hCoV-19/Poland/PL_P25/2020|EPI_ISL_451986|2020-04-07
>hCoV-19/Poland/PL_P26/2020|EPI_ISL_451987|2020-04-01
>hCoV-19/Denmark/ALAB-HH-101/2020|EPI_ISL_451988|2020-03-09
>hCoV-19/Denmark/ALAB-HH-102/2020|EPI_ISL_451989|2020-03-08
>hCoV-19/Denmark/ALAB-HH-104/2020|EPI_ISL_451990|2020-03-08
>hCoV-19/Denmark/ALAB-HH-106/2020|EPI_ISL_451991|2020-03-09
>hCoV-19/Denmark/ALAB-HH-107/2020|EPI_ISL_451992|2020-03-09
>hCoV-19/Denmark/ALAB-HH-108/2020|EPI_ISL_451993|2020-03-09
>hCoV-19/Denmark/ALAB-HH-110/2020|EPI_ISL_451994|2020-03-09
>hCoV-19/Denmark/ALAB-HH-111/2020|EPI_ISL_451995|2020-03-09
>hCoV-19/Denmark/ALAB-HH-112/2020|EPI_ISL_451996|2020-03-09
>hCoV-19/Denmark/ALAB-HH-113/2020|EPI_ISL_451997|2020-03-09
>hCoV-19/Denmark/ALAB-HH-114/2020|EPI_ISL_451998|2020-03-09
>hCoV-19/Denmark/ALAB-HH-115/2020|EPI_ISL_451999|2020-03-09
>hCoV-19/Hong Kong/VB20024950-2/2020|EPI_ISL_412029|2020-01-30
>hCoV-19/Hong Kong/VB20026565-2/2020|EPI_ISL_412030|2020-02-01
>hCoV-19/Guangzhou/GZMU0016/2020|EPI_ISL_414663|2020-02-25
>hCoV-19/Guangzhou/GZMU0047/2020|EPI_ISL_414690|2020-02-25
>hCoV-19/Guangzhou/GZMU0048/2020|EPI_ISL_414691|2020-02-25
>hCoV-19/Guangzhou/GZMU0014/2020|EPI_ISL_414692|2020-02-25
>hCoV-19/England/20129020304/2020|EPI_ISL_424010|2020-03-20
>hCoV-19/England/20129020604/2020|EPI_ISL_424012|2020-03-20
>hCoV-19/England/20129023104/2020|EPI_ISL_424015|2020-03-19
>hCoV-19/England/20129025404/2020|EPI_ISL_424017|2020-03-12
>hCoV-19/England/20129025506/2020|EPI_ISL_424018|2020-03-12
>hCoV-19/England/20129063804/2020|EPI_ISL_424062|2020-03-11
>hCoV-19/England/20129085704/2020|EPI_ISL_424076|2020-03-21
>hCoV-19/England/20129089504/2020|EPI_ISL_424078|2020-03-11
>hCoV-19/England/20129089602/2020|EPI_ISL_424079|2020-03-11
>hCoV-19/England/20129091804/2020|EPI_ISL_424080|2020-03-11
>hCoV-19/England/20129096604/2020|EPI_ISL_424082|2020-03-11
>hCoV-19/England/20129096804/2020|EPI_ISL_424084|2020-03-11
>hCoV-19/England/20129099904/2020|EPI_ISL_424087|2020-03-21
>hCoV-19/England/20129100204/2020|EPI_ISL_424088|2020-03-13
>hCoV-19/USA/WA-UW-1890/2020|EPI_ISL_424316|2020-03-24
>hCoV-19/USA/WA-UW-1928/2020|EPI_ISL_424317|2020-03-24
>hCoV-19/USA/ID-UW-1938/2020|EPI_ISL_424318|2020-03-22
>hCoV-19/USA/ID-UW-1935/2020|EPI_ISL_424319|2020-03-22
>hCoV-19/USA/ID-UW-1925/2020|EPI_ISL_424321|2020-03-20
>hCoV-19/USA/ID-UW-1934/2020|EPI_ISL_424322|2020-03-20
>hCoV-19/USA/WA-UW-1944/2020|EPI_ISL_424323|2020-03-24
>hCoV-19/USA/WA-UW-1965/2020|EPI_ISL_424324|2020-03-24
>hCoV-19/USA/WA-UW-1954/2020|EPI_ISL_424325|2020-03-24
>hCoV-19/USA/WA-UW-1968/2020|EPI_ISL_424326|2020-03-20
>hCoV-19/USA/WA-UW-1947/2020|EPI_ISL_424327|2020-03-23
>hCoV-19/USA/WA-UW-1984/2020|EPI_ISL_424329|2020-03-24
>hCoV-19/USA/WA-UW-1865/2020|EPI_ISL_424330|2020-03-23
>hCoV-19/USA/WA-UW-1907/2020|EPI_ISL_424331|2020-03-22
>hCoV-19/USA/WA-UW-1917/2020|EPI_ISL_424332|2020-03-22
>hCoV-19/USA/WA-UW-2006/2020|EPI_ISL_424333|2020-03-24
>hCoV-19/USA/WA-UW-1994/2020|EPI_ISL_424334|2020-03-24
>hCoV-19/USA/WA-UW-1998/2020|EPI_ISL_424335|2020-03-24
>hCoV-19/Australia/VIC327/2020|EPI_ISL_426637|2020-03-17
>hCoV-19/Australia/VIC328/2020|EPI_ISL_426638|2020-03-17
>hCoV-19/Australia/VIC329/2020|EPI_ISL_426639|2020-03-17
>hCoV-19/Australia/VIC351/2020|EPI_ISL_426659|2020-03-20
>hCoV-19/Australia/VIC353/2020|EPI_ISL_426661|2020-03-21
>hCoV-19/Australia/VIC354/2020|EPI_ISL_426662|2020-03-21
>hCoV-19/Australia/VIC355/2020|EPI_ISL_426663|2020-03-21
>hCoV-19/Australia/VIC356/2020|EPI_ISL_426664|2020-03-21
>hCoV-19/Australia/VIC357/2020|EPI_ISL_426665|2020-03-21
>hCoV-19/Australia/VIC358/2020|EPI_ISL_426666|2020-03-21
>hCoV-19/Australia/VIC359/2020|EPI_ISL_426667|2020-03-22
>hCoV-19/Australia/VIC361/2020|EPI_ISL_426669|2020-03-22
>hCoV-19/Australia/VIC362/2020|EPI_ISL_426670|2020-03-22
>hCoV-19/Australia/VIC363/2020|EPI_ISL_426671|2020-03-22
>hCoV-19/Australia/VIC364/2020|EPI_ISL_426672|2020-03-22
>hCoV-19/Australia/VIC365/2020|EPI_ISL_426673|2020-03-22
>hCoV-19/Australia/VIC366/2020|EPI_ISL_426674|2020-03-22
>hCoV-19/Australia/VIC367/2020|EPI_ISL_426675|2020-03-22
>hCoV-19/Australia/VIC368/2020|EPI_ISL_426676|2020-03-22
>hCoV-19/Australia/VIC369/2020|EPI_ISL_426677|2020-03-22
>hCoV-19/Australia/VIC372/2020|EPI_ISL_426679|2020-03-22
>hCoV-19/Australia/VIC662/2020|EPI_ISL_426958|2020-03-27
>hCoV-19/Australia/VIC663/2020|EPI_ISL_426959|2020-03-28
>hCoV-19/Australia/VIC664/2020|EPI_ISL_426960|2020-03-27
>hCoV-19/Australia/VIC665/2020|EPI_ISL_426961|2020-03-27
>hCoV-19/Australia/VIC666/2020|EPI_ISL_426962|2020-03-27
>hCoV-19/Australia/VIC667/2020|EPI_ISL_426963|2020-03-27
>hCoV-19/Australia/VIC668/2020|EPI_ISL_426964|2020-03-27
>hCoV-19/Australia/VIC672/2020|EPI_ISL_426968|2020-03-27
>hCoV-19/Australia/VIC674/2020|EPI_ISL_426970|2020-03-27
>hCoV-19/Australia/VIC676/2020|EPI_ISL_426971|2020-03-27
>hCoV-19/Australia/VIC677/2020|EPI_ISL_426972|2020-03-27
>hCoV-19/Australia/VIC678/2020|EPI_ISL_426973|2020-03-27
>hCoV-19/Australia/VIC679/2020|EPI_ISL_426974|2020-03-27
>hCoV-19/Australia/VIC680/2020|EPI_ISL_426975|2020-03-27
>hCoV-19/Australia/VIC681/2020|EPI_ISL_426976|2020-03-27
>hCoV-19/Australia/VIC682/2020|EPI_ISL_426977|2020-03-29
>hCoV-19/USA/DC-CDC-9096/2020|EPI_ISL_436040|2020-03-20
>hCoV-19/USA/DC-CDC-9092/2020|EPI_ISL_436041|2020-03-22
>hCoV-19/USA/DC-CDC-1734/2020|EPI_ISL_436042|2020-03-29
>hCoV-19/USA/DC-CDC-1738/2020|EPI_ISL_436043|2020-03-28
>hCoV-19/USA/LA-CDC-1894/2020|EPI_ISL_436044|2020-03-23
>hCoV-19/USA/VI-CDC-1999/2020|EPI_ISL_436045|2020-03-21
>hCoV-19/USA/VI-CDC-1993/2020|EPI_ISL_436046|2020-04-01
>hCoV-19/USA/NY-SURV052/2020|EPI_ISL_436047|2020-03-04
>hCoV-19/USA/NY-SURV076/2020|EPI_ISL_436048|2020-03-05
>hCoV-19/USA/NY-SURV097/2020|EPI_ISL_436049|2020-03-09
>hCoV-19/USA/NY-SURV0144/2020|EPI_ISL_436050|2020-03-02
>hCoV-19/USA/NY-SURV0162/2020|EPI_ISL_436051|2020-03-09
>hCoV-19/USA/NY-SURV0165/2020|EPI_ISL_436052|2020-03-09
>hCoV-19/USA/NY-SURV0166/2020|EPI_ISL_436053|2020-03-09
>hCoV-19/USA/NY-SURV0168/2020|EPI_ISL_436054|2020-03-09
>hCoV-19/USA/NY-SURV0171/2020|EPI_ISL_436055|2020-03-09
>hCoV-19/USA/NY-SURV0175/2020|EPI_ISL_436056|2020-03-09
>hCoV-19/USA/NY-SURV0183/2020|EPI_ISL_436057|2020-03-17
>hCoV-19/USA/NY-SURV0186/2020|EPI_ISL_436058|2020-03-17
>hCoV-19/USA/NY-SURV0240/2020|EPI_ISL_436059|2020-03-17
>hCoV-19/USA/NY-SURV0302/2020|EPI_ISL_436060|2020-03-09
>hCoV-19/USA/NY-SURV0319/2020|EPI_ISL_436061|2020-03-08
>hCoV-19/USA/NY-SURV0331/2020|EPI_ISL_436062|2020-03-09
>hCoV-19/USA/NY-SURV0334/2020|EPI_ISL_436063|2020-03-09
>hCoV-19/USA/NY-SURV0397/2020|EPI_ISL_436064|2020-03-17
>hCoV-19/USA/NY-SURV0407/2020|EPI_ISL_436065|2020-03-17
>hCoV-19/USA/NY-SURV0440/2020|EPI_ISL_436066|2020-03-09
>hCoV-19/USA/NY-SURV0444/2020|EPI_ISL_436067|2020-03-09
>hCoV-19/USA/NY-SURV0472/2020|EPI_ISL_436068|2020-03-09
>hCoV-19/USA/NY-SURV0475/2020|EPI_ISL_436069|2020-03-09
>hCoV-19/USA/NY-SURV0495/2020|EPI_ISL_436070|2020-03-13
>hCoV-19/USA/NY-SURV0513/2020|EPI_ISL_436071|2020-03-17
>hCoV-19/USA/NY-SURV0592/2020|EPI_ISL_436072|2020-03-08
>hCoV-19/USA/NY-SURV0710/2020|EPI_ISL_436073|2020-03-17
>hCoV-19/USA/NY-SURV0862/2020|EPI_ISL_436074|2020-03-10
>hCoV-19/USA/NY-SURV0863/2020|EPI_ISL_436075|2020-03-10
>hCoV-19/USA/NY-SURV0874/2020|EPI_ISL_436076|2020-03-09
>hCoV-19/USA/NY-SURV0982/2020|EPI_ISL_436077|2020-03-19
>hCoV-19/USA/NY-SURV0983/2020|EPI_ISL_436078|2020-03-19
>hCoV-19/USA/NY-SURV0985/2020|EPI_ISL_436079|2020-03-19
>hCoV-19/USA/NY-SURV0988/2020|EPI_ISL_436080|2020-03-18
>hCoV-19/USA/NY-SURV0996/2020|EPI_ISL_436081|2020-03-17
>hCoV-19/USA/NY-SURV1000/2020|EPI_ISL_436082|2020-03-19
>hCoV-19/Australia/QLDID935/2020|EPI_ISL_436097|2020-03-25
>hCoV-19/Australia/QLDID936/2020|EPI_ISL_436098|2020-03-23
>hCoV-19/Taiwan/TSGH-24/2020|EPI_ISL_436099|2020-04-02
>hCoV-19/England/CAMB-820AC/2020|EPI_ISL_438618|2020-04-21
>hCoV-19/England/CAMB-820CA/2020|EPI_ISL_438619|2020-04-21
>hCoV-19/England/CAMB-82121/2020|EPI_ISL_438621|2020-04-21
>hCoV-19/England/CAMB-82130/2020|EPI_ISL_438622|2020-04-21
>hCoV-19/England/CAMB-8214F/2020|EPI_ISL_438623|2020-04-21
>hCoV-19/England/CAMB-8216D/2020|EPI_ISL_438624|2020-04-20
>hCoV-19/England/CAMB-8217C/2020|EPI_ISL_438625|2020-04-21
>hCoV-19/England/CAMB-8218B/2020|EPI_ISL_438626|2020-04-20
>hCoV-19/England/CAMB-829DE/2020|EPI_ISL_438644|2020-04-23
>hCoV-19/England/CAMB-829FC/2020|EPI_ISL_438645|2020-04-23
>hCoV-19/England/CAMB-82A17/2020|EPI_ISL_438647|2020-04-23
>hCoV-19/England/CAMB-82A44/2020|EPI_ISL_438649|2020-04-23
>hCoV-19/England/CAMB-82A53/2020|EPI_ISL_438650|2020-04-23
>hCoV-19/England/CAMB-82A71/2020|EPI_ISL_438652|2020-04-23
>hCoV-19/England/CAMB-82ABD/2020|EPI_ISL_438656|2020-04-23
>hCoV-19/England/CAMB-82ADB/2020|EPI_ISL_438658|2020-04-23
>hCoV-19/Scotland/CVR2738/2020|EPI_ISL_438937|2020-04-16
>hCoV-19/Scotland/CVR2743/2020|EPI_ISL_438941|2020-04-18
>hCoV-19/Scotland/CVR2746/2020|EPI_ISL_438944|2020-04-18
>hCoV-19/Japan/Donner2/2020|EPI_ISL_438947|2020-04-06
>hCoV-19/Japan/Donner3/2020|EPI_ISL_438948|2020-04-06
>hCoV-19/Japan/Donner4/2020|EPI_ISL_438949|2020-04-06
>hCoV-19/Japan/Donner6/2020|EPI_ISL_438951|2020-04-06
>hCoV-19/Japan/Donner7/2020|EPI_ISL_438952|2020-04-06
>hCoV-19/Japan/Donner8/2020|EPI_ISL_438953|2020-04-06
>hCoV-19/Japan/Donner9/2020|EPI_ISL_438954|2020-04-06
>hCoV-19/Japan/Donner11/2020|EPI_ISL_438955|2020-04-08
>hCoV-19/Japan/Donner12/2020|EPI_ISL_438956|2020-04-09
>hCoV-19/England/CAMB-1AD8DF/2020|EPI_ISL_448021|2020-05-01
>hCoV-19/England/CAMB-1AD8EE/2020|EPI_ISL_448022|2020-05-02
>hCoV-19/England/CAMB-1AD909/2020|EPI_ISL_448023|2020-05-01
>hCoV-19/England/CAMB-1AD918/2020|EPI_ISL_448024|2020-05-02
>hCoV-19/England/CAMB-1ADAF7/2020|EPI_ISL_448033|2020-05-01
>hCoV-19/England/CAMB-1ADB21/2020|EPI_ISL_448035|2020-05-01
>hCoV-19/England/CAMB-1ADB30/2020|EPI_ISL_448036|2020-05-02
>hCoV-19/England/CAMB-1ADB5E/2020|EPI_ISL_448037|2020-05-03
>hCoV-19/England/CAMB-1ADB6D/2020|EPI_ISL_448038|2020
>hCoV-19/England/CAMB-1ADB7C/2020|EPI_ISL_448039|2020-05-03
>hCoV-19/England/CAMB-1ADB8B/2020|EPI_ISL_448040|2020-05-03
>hCoV-19/England/CAMB-1ADB9A/2020|EPI_ISL_448041|2020-05-03
>hCoV-19/England/CAMB-1ADBA9/2020|EPI_ISL_448042|2020-05-04
>hCoV-19/England/CAMB-1ADBB8/2020|EPI_ISL_448043|2020-05-04
>hCoV-19/England/CAMB-1ADBC7/2020|EPI_ISL_448044|2020-05-04
>hCoV-19/England/CAMB-1ADBE5/2020|EPI_ISL_448046|2020-05-04
>hCoV-19/England/CAMB-1ADBF4/2020|EPI_ISL_448047|2020-05-04
>hCoV-19/England/CAMB-1ADC79/2020|EPI_ISL_448049|2020-05-06
>hCoV-19/England/CAMB-1AE391/2020|EPI_ISL_448051|2020-05-04
>hCoV-19/England/CAMB-1AEBB7/2020|EPI_ISL_448056|2020-05-01
>hCoV-19/England/CAMB-1AEBE4/2020|EPI_ISL_448059|2020-05-04
>hCoV-19/England/CAMB-1AEBF3/2020|EPI_ISL_448060|2020-05-04
>hCoV-19/England/CAMB-1AEC2D/2020|EPI_ISL_448063|2020-05-04
>hCoV-19/England/CAMB-1AEC4B/2020|EPI_ISL_448064|2020-05-04
>hCoV-19/England/CAMB-1AEC78/2020|EPI_ISL_448066|2020-05-05
>hCoV-19/England/CAMB-1AEC96/2020|EPI_ISL_448068|2020-05-05
>hCoV-19/England/CAMB-1AECE1/2020|EPI_ISL_448072|2020
>hCoV-19/England/CAMB-1AECF0/2020|EPI_ISL_448073|2020
>hCoV-19/England/CAMB-1AED39/2020|EPI_ISL_448077|2020-05-07
>hCoV-19/England/CAMB-1AED48/2020|EPI_ISL_448078|2020-05-08
>hCoV-19/England/CAMB-1AF55E/2020|EPI_ISL_448080|2020-05-08
>hCoV-19/England/CAMB-1AF56D/2020|EPI_ISL_448081|2020-05-07
>hCoV-19/England/CAMB-1AF58B/2020|EPI_ISL_448082|2020-05-09
>hCoV-19/England/CAMB-1AF5A9/2020|EPI_ISL_448083|2020-05-07
>hCoV-19/England/CAMB-1AF5C7/2020|EPI_ISL_448084|2020-05-07
>hCoV-19/England/CAMB-1AF5E5/2020|EPI_ISL_448085|2020
>hCoV-19/England/CAMB-1AF600/2020|EPI_ISL_448086|2020-05-06
>hCoV-19/England/CAMB-1AF62E/2020|EPI_ISL_448087|2020-05-06
>hCoV-19/England/CAMB-1AF64C/2020|EPI_ISL_448088|2020-05-08
>hCoV-19/England/CAMB-1AF688/2020|EPI_ISL_448090|2020-05-07
>hCoV-19/England/CAMB-1AFFAB/2020|EPI_ISL_448092|2020-05-07
>hCoV-19/England/CAMB-1AFFE7/2020|EPI_ISL_448095|2020
>hCoV-19/England/CAMB-1AFFF6/2020|EPI_ISL_448096|2020-05-07
>hCoV-19/England/CAMB-1B000E/2020|EPI_ISL_448097|2020-05-06
>hCoV-19/England/CAMB-1B001D/2020|EPI_ISL_448098|2020-05-06
>hCoV-19/Australia/NSW338/2020|EPI_ISL_451600|2020-04-05
>hCoV-19/Australia/NSW339/2020|EPI_ISL_451601|2020-03-25
>hCoV-19/Australia/NSW340/2020|EPI_ISL_451602|2020-03-24
>hCoV-19/Australia/NSW341/2020|EPI_ISL_451603|2020-04-01
>hCoV-19/Australia/NSW342/2020|EPI_ISL_451604|2020-03-29
>hCoV-19/Australia/NSW344/2020|EPI_ISL_451605|2020-04-02
>hCoV-19/Australia/NSW345/2020|EPI_ISL_451606|2020-04-01
>hCoV-19/Australia/NSW346/2020|EPI_ISL_451607|2020-03-30
>hCoV-19/Australia/NSW347/2020|EPI_ISL_451608|2020-03-27
>hCoV-19/Australia/NSW348/2020|EPI_ISL_451609|2020-03-23
>hCoV-19/Australia/NSW349/2020|EPI_ISL_451610|2020-04-02
>hCoV-19/Australia/NSW350/2020|EPI_ISL_451611|2020-03-24
>hCoV-19/Australia/NSW351/2020|EPI_ISL_451612|2020-03-20
>hCoV-19/Australia/NSW352/2020|EPI_ISL_451613|2020-04-08
>hCoV-19/Australia/NSW353/2020|EPI_ISL_451614|2020-04-17
>hCoV-19/Australia/NSW354/2020|EPI_ISL_451615|2020-04-17
>hCoV-19/Australia/NSW355/2020|EPI_ISL_451616|2020-04-17
>hCoV-19/Australia/NSW356/2020|EPI_ISL_451617|2020-04-14
>hCoV-19/Australia/NSW357/2020|EPI_ISL_451618|2020-04-14
>hCoV-19/Australia/NSW358/2020|EPI_ISL_451619|2020-04-14
>hCoV-19/Poland/Sla8/2020|EPI_ISL_451662|2020-05-05
>hCoV-19/Poland/Sla9/2020|EPI_ISL_451663|2020-05-05
>hCoV-19/Poland/Sla10/2020|EPI_ISL_451664|2020-05-05
>hCoV-19/USA/NY-NYUMC751/2020|EPI_ISL_451665|2020-03-20
>hCoV-19/India/GBRC103/2020|EPI_ISL_451666|2020-05-04
>hCoV-19/Switzerland/100075/2020|EPI_ISL_451668|2020-03-12
>hCoV-19/Switzerland/100076/2020|EPI_ISL_451669|2020-03-12
>hCoV-19/Switzerland/100080/2020|EPI_ISL_451672|2020-03-13
>hCoV-19/Switzerland/100081/2020|EPI_ISL_451673|2020-03-13
>hCoV-19/Switzerland/100082/2020|EPI_ISL_451674|2020-03-13
>hCoV-19/Switzerland/100083/2020|EPI_ISL_451675|2020-03-13
>hCoV-19/Switzerland/100084/2020|EPI_ISL_451676|2020-03-13
>hCoV-19/Switzerland/100085/2020|EPI_ISL_451677|2020-03-13
>hCoV-19/Switzerland/100086/2020|EPI_ISL_451678|2020-03-13
>hCoV-19/Switzerland/100088/2020|EPI_ISL_451680|2020-03-13
>hCoV-19/Switzerland/100089/2020|EPI_ISL_451681|2020-03-12
>hCoV-19/Switzerland/100090/2020|EPI_ISL_451682|2020-03-13
>hCoV-19/Switzerland/100091/2020|EPI_ISL_451683|2020-03-13
>hCoV-19/Switzerland/100092/2020|EPI_ISL_451684|2020-03-13
>hCoV-19/Switzerland/100093/2020|EPI_ISL_451685|2020-03-13
>hCoV-19/Switzerland/100096/2020|EPI_ISL_451688|2020-03-12
>hCoV-19/Switzerland/100097/2020|EPI_ISL_451689|2020-03-13
>hCoV-19/Switzerland/100098/2020|EPI_ISL_451690|2020-03-13
>hCoV-19/Switzerland/100099/2020|EPI_ISL_451691|2020-03-13
>hCoV-19/Switzerland/100108/2020|EPI_ISL_451692|2020-03-14
>hCoV-19/Switzerland/100109/2020|EPI_ISL_451693|2020-03-14
>hCoV-19/Switzerland/100110/2020|EPI_ISL_451694|2020-03-16
>hCoV-19/Switzerland/100111/2020|EPI_ISL_451695|2020-03-16
>hCoV-19/Switzerland/100112/2020|EPI_ISL_451696|2020-03-16
>hCoV-19/Switzerland/100113/2020|EPI_ISL_451697|2020-03-16
>hCoV-19/Switzerland/100114/2020|EPI_ISL_451698|2020-03-16
>hCoV-19/Switzerland/100115/2020|EPI_ISL_451699|2020-03-16
>hCoV-19/Switzerland/110489/2020|EPI_ISL_451900|2020-04-07
>hCoV-19/Switzerland/110491/2020|EPI_ISL_451902|2020-04-07
>hCoV-19/Switzerland/110498/2020|EPI_ISL_451906|2020-04-07
>hCoV-19/Switzerland/110500/2020|EPI_ISL_451908|2020-04-07
>hCoV-19/Switzerland/110503/2020|EPI_ISL_451909|2020-04-07
>hCoV-19/Switzerland/110505/2020|EPI_ISL_451911|2020-04-07
>hCoV-19/Switzerland/110507/2020|EPI_ISL_451913|2020-04-07
>hCoV-19/Switzerland/110508/2020|EPI_ISL_451914|2020-04-07
>hCoV-19/Switzerland/110509/2020|EPI_ISL_451915|2020-04-07
>hCoV-19/Switzerland/110510/2020|EPI_ISL_451916|2020-04-07
>hCoV-19/Hefei/2/2020|EPI_ISL_412026|2020-02-23
>hCoV-19/Hong Kong/VM20001061-2/2020|EPI_ISL_412028|2020-01-22
>hCoV-19/France/GE1583/2020|EPI_ISL_414600|2020-02-26
>hCoV-19/USA/WA-UW29/2020|EPI_ISL_414616|2020-03-08
>hCoV-19/USA/WA-UW30/2020|EPI_ISL_414617|2020-03-08
>hCoV-19/USA/WA-UW31/2020|EPI_ISL_414618|2020-03-08
>hCoV-19/USA/WA-UW32/2020|EPI_ISL_414619|2020-03-07
>hCoV-19/USA/WA-UW33/2020|EPI_ISL_414620|2020-03-08
>hCoV-19/USA/WA-UW34/2020|EPI_ISL_414621|2020-03-07
>hCoV-19/USA/WA-UW35/2020|EPI_ISL_414622|2020-03-08
>hCoV-19/France/GE1583/2020|EPI_ISL_414623|2020-02-25
>hCoV-19/France/N1620/2020|EPI_ISL_414624|2020-02-26
>hCoV-19/France/PL1643/2020|EPI_ISL_414625|2020-02-26
>hCoV-19/France/HF1684/2020|EPI_ISL_414626|2020-02-29
>hCoV-19/France/HF1795/2020|EPI_ISL_414627|2020-03-02
>hCoV-19/France/HF1805/2020|EPI_ISL_414628|2020-03-02
>hCoV-19/France/HF1870/2020|EPI_ISL_414629|2020-03-03
>hCoV-19/France/HF1871/2020|EPI_ISL_414630|2020-03-03
>hCoV-19/France/GE1973/2020|EPI_ISL_414631|2020-03-04
>hCoV-19/France/GE1977/2020|EPI_ISL_414632|2020-03-04
>hCoV-19/France/IDF1980/2020|EPI_ISL_414633|2020-03-04
>hCoV-19/France/HF1986/2020|EPI_ISL_414634|2020-03-04
>hCoV-19/France/HF1988/2020|EPI_ISL_414635|2020-03-04
>hCoV-19/France/HF1989/2020|EPI_ISL_414636|2020-03-04
>hCoV-19/France/HF1993/2020|EPI_ISL_414637|2020-03-04
>hCoV-19/France/HF1995/2020|EPI_ISL_414638|2020-03-04
>hCoV-19/USA/NY-NYUMC1/2020|EPI_ISL_414639|2020-03-04
>hCoV-19/Finland/FIN-313/2020|EPI_ISL_414641|2020-03-05
>hCoV-19/Finland/FIN-455/2020|EPI_ISL_414642|2020-03-08
>hCoV-19/Finland/FIN-508/2020|EPI_ISL_414643|2020-03-07
>hCoV-19/Finland/FIN-266/2020|EPI_ISL_414646|2020-03-04
>hCoV-19/DRC/KN-13/2020|EPI_ISL_414647|2020-03-09
>hCoV-19/USA/CA-PC101P/2020|EPI_ISL_414648|2020-03-11
>hCoV-19/Guangzhou/GZMU0030/2020|EPI_ISL_414686|2020-02-27
>hCoV-19/Guangzhou/GZMU0031/2020|EPI_ISL_414687|2020-02-25
>hCoV-19/Guangzhou/GZMU0044/2020|EPI_ISL_414689|2020-02-25
>hCoV-19/England/20129016004/2020|EPI_ISL_424000|2020-03-21
>hCoV-19/England/20129016104/2020|EPI_ISL_424001|2020-03-19
>hCoV-19/England/20129017104/2020|EPI_ISL_424003|2020-03-20
>hCoV-19/England/20129018604/2020|EPI_ISL_424006|2020-03-20
>hCoV-19/England/20129018904/2020|EPI_ISL_424007|2020-03-20
>hCoV-19/England/20129020004/2020|EPI_ISL_424009|2020-03-20
>hCoV-19/England/20129031804/2020|EPI_ISL_424019|2020-03-19
>hCoV-19/England/20129032404/2020|EPI_ISL_424021|2020-03-20
>hCoV-19/England/20129033804/2020|EPI_ISL_424024|2020-03-20
>hCoV-19/England/20129033904/2020|EPI_ISL_424025|2020-03-20
>hCoV-19/England/20129034704/2020|EPI_ISL_424027|2020-03-21
>hCoV-19/England/20129035304/2020|EPI_ISL_424028|2020-03-21
>hCoV-19/England/20129035404/2020|EPI_ISL_424029|2020-03-20
>hCoV-19/England/20129035804/2020|EPI_ISL_424031|2020-03-20
>hCoV-19/England/20129036004/2020|EPI_ISL_424032|2020-03-20
>hCoV-19/England/20129036404/2020|EPI_ISL_424034|2020-03-20
>hCoV-19/England/20129036504/2020|EPI_ISL_424035|2020-03-20
>hCoV-19/England/20129037204/2020|EPI_ISL_424037|2020-03-20
>hCoV-19/England/20129037304/2020|EPI_ISL_424038|2020-03-20
>hCoV-19/England/20129042806/2020|EPI_ISL_424045|2020-03-11
>hCoV-19/England/20129047706/2020|EPI_ISL_424049|2020-03-13
>hCoV-19/England/20129054906/2020|EPI_ISL_424051|2020-02-12
>hCoV-19/England/20129056804/2020|EPI_ISL_424052|2020-03-21
>hCoV-19/England/20129059204/2020|EPI_ISL_424054|2020-03-09
>hCoV-19/USA/WA-UW-1294/2020|EPI_ISL_424180|2020-03-18
>hCoV-19/USA/UN-UW-1402/2020|EPI_ISL_424181|2020-03-16
>hCoV-19/USA/WA-UW-1478/2020|EPI_ISL_424182|2020-03-18
>hCoV-19/USA/WA-UW-1436/2020|EPI_ISL_424183|2020-03-18
>hCoV-19/USA/WA-UW-1422/2020|EPI_ISL_424184|2020-03-18
>hCoV-19/USA/WA-UW-1644/2020|EPI_ISL_424186|2020-03-20
>hCoV-19/USA/WA-UW-1646/2020|EPI_ISL_424187|2020-03-20
>hCoV-19/USA/WA-UW-1645/2020|EPI_ISL_424188|2020-03-20
>hCoV-19/USA/UN-UW-Not found/2020|EPI_ISL_424189|2020-03
>hCoV-19/USA/WA-UW-1683/2020|EPI_ISL_424191|2020-03-20
>hCoV-19/USA/WA-UW-1688/2020|EPI_ISL_424192|2020-03-20
>hCoV-19/USA/WA-UW-1728/2020|EPI_ISL_424193|2020-03-21
>hCoV-19/USA/WA-UW-1661/2020|EPI_ISL_424194|2020-03-20
>hCoV-19/USA/WA-UW-1726/2020|EPI_ISL_424195|2020-03-21
>hCoV-19/USA/WA-UW-1666/2020|EPI_ISL_424196|2020-03-20
>hCoV-19/USA/WA-UW-1640/2020|EPI_ISL_424197|2020-03-20
>hCoV-19/USA/WA-UW-1656/2020|EPI_ISL_424198|2020-03-20
>hCoV-19/USA/NY-NYUMC162/2020|EPI_ISL_426617|2020-04-01
>hCoV-19/USA/NY-NYUMC163/2020|EPI_ISL_426618|2020-04-01
>hCoV-19/USA/NY-NYUMC164/2020|EPI_ISL_426619|2020-04-01
>hCoV-19/USA/NY-NYUMC165/2020|EPI_ISL_426620|2020-04-01
>hCoV-19/USA/NY-NYUMC166/2020|EPI_ISL_426621|2020-04-01
>hCoV-19/USA/NY-NYUMC167/2020|EPI_ISL_426622|2020-04-01
>hCoV-19/USA/NY-NYUMC168/2020|EPI_ISL_426623|2020-04-01
>hCoV-19/USA/NY-NYUMC169/2020|EPI_ISL_426624|2020-04-01
>hCoV-19/USA/NY-NYUMC170/2020|EPI_ISL_426625|2020-04-01
>hCoV-19/USA/NY-NYUMC171/2020|EPI_ISL_426626|2020-04-01
>hCoV-19/USA/LA-BIE-096/2020|EPI_ISL_426627|2020-04-06
>hCoV-19/USA/LA-BIE-097/2020|EPI_ISL_426628|2020-04-06
>hCoV-19/Taiwan/TSGH-01/2020|EPI_ISL_426629|2020-02-07
>hCoV-19/Taiwan/TSGH-02/2020|EPI_ISL_426630|2020-03-17
>hCoV-19/Taiwan/TSGH-03/2020|EPI_ISL_426631|2020-03-17
>hCoV-19/Taiwan/TSGH-04/2020|EPI_ISL_426632|2020-03-17
>hCoV-19/Australia/NT08/2020|EPI_ISL_426634|2020-03-20
>hCoV-19/Australia/NT18/2020|EPI_ISL_426635|2020-03-23
>hCoV-19/Australia/NT19/2020|EPI_ISL_426636|2020-03-25
>hCoV-19/Australia/VIC330/2020|EPI_ISL_426640|2020-03-18
>hCoV-19/Australia/VIC332/2020|EPI_ISL_426641|2020-03-18
>hCoV-19/Australia/VIC333/2020|EPI_ISL_426642|2020-03-18
>hCoV-19/Australia/VIC334/2020|EPI_ISL_426643|2020-03-19
>hCoV-19/Australia/VIC335/2020|EPI_ISL_426644|2020-03-20
>hCoV-19/Australia/VIC336/2020|EPI_ISL_426645|2020-03-20
>hCoV-19/Australia/VIC337/2020|EPI_ISL_426646|2020-03-20
>hCoV-19/Australia/VIC338/2020|EPI_ISL_426647|2020-03-20
>hCoV-19/Australia/VIC339/2020|EPI_ISL_426648|2020-03-20
>hCoV-19/Australia/VIC340/2020|EPI_ISL_426649|2020-03-20
>hCoV-19/Australia/VIC341/2020|EPI_ISL_426650|2020-03-20
>hCoV-19/Australia/VIC342/2020|EPI_ISL_426651|2020-03-20
>hCoV-19/Australia/VIC343/2020|EPI_ISL_426652|2020-03-20
>hCoV-19/Australia/VIC344/2020|EPI_ISL_426653|2020-03-20
>hCoV-19/Australia/VIC345/2020|EPI_ISL_426654|2020-03-20
>hCoV-19/Australia/VIC346/2020|EPI_ISL_426655|2020-03-20
>hCoV-19/Australia/VIC347/2020|EPI_ISL_426656|2020-03-20
>hCoV-19/Australia/VIC348/2020|EPI_ISL_426657|2020-03-20
>hCoV-19/Australia/VIC350/2020|EPI_ISL_426658|2020-03-20
>hCoV-19/Australia/VIC373/2020|EPI_ISL_426680|2020-03-22
>hCoV-19/Australia/VIC375/2020|EPI_ISL_426682|2020-03-22
>hCoV-19/Australia/VIC376/2020|EPI_ISL_426683|2020-03-22
>hCoV-19/Australia/VIC377/2020|EPI_ISL_426684|2020-03-22
>hCoV-19/Australia/VIC378/2020|EPI_ISL_426685|2020-03-22
>hCoV-19/Australia/VIC379/2020|EPI_ISL_426686|2020-03-22
>hCoV-19/Australia/VIC380/2020|EPI_ISL_426687|2020-03-23
>hCoV-19/Australia/VIC381/2020|EPI_ISL_426688|2020-03-23
>hCoV-19/Australia/VIC382/2020|EPI_ISL_426689|2020-03-23
>hCoV-19/Australia/VIC383/2020|EPI_ISL_426690|2020-03-23
>hCoV-19/Australia/VIC384/2020|EPI_ISL_426691|2020-03-23
>hCoV-19/Australia/VIC385/2020|EPI_ISL_426692|2020-03-23
>hCoV-19/Australia/VIC386/2020|EPI_ISL_426693|2020-03-23
>hCoV-19/Australia/VIC387/2020|EPI_ISL_426694|2020-03-23
>hCoV-19/Australia/VIC389/2020|EPI_ISL_426696|2020-03-23
>hCoV-19/Australia/VIC394/2020|EPI_ISL_426697|2020-03-24
>hCoV-19/Australia/VIC395/2020|EPI_ISL_426698|2020-03-24
>hCoV-19/Spain/Valencia102/2020|EPI_ISL_436197|2020-03-17
>hCoV-19/England/CAMB-81F82/2020|EPI_ISL_438600|2020-04-21
>hCoV-19/England/CAMB-81F91/2020|EPI_ISL_438601|2020-04-21
>hCoV-19/England/CAMB-81FA0/2020|EPI_ISL_438602|2020-04-20
>hCoV-19/England/CAMB-81FCE/2020|EPI_ISL_438604|2020-04-20
>hCoV-19/England/CAMB-81FDD/2020|EPI_ISL_438605|2020-04-22
>hCoV-19/England/CAMB-82006/2020|EPI_ISL_438608|2020-04-20
>hCoV-19/England/CAMB-82024/2020|EPI_ISL_438610|2020-04-21
>hCoV-19/England/CAMB-82103/2020|EPI_ISL_438620|2020-04-21
>hCoV-19/England/CAMB-821A9/2020|EPI_ISL_438628|2020-04-20
>hCoV-19/England/CAMB-821C7/2020|EPI_ISL_438630|2020-04-21
>hCoV-19/England/CAMB-821E5/2020|EPI_ISL_438631|2020-04-21
>hCoV-19/England/CAMB-821F4/2020|EPI_ISL_438632|2020-04-21
>hCoV-19/England/CAMB-82200/2020|EPI_ISL_438633|2020-04-21
>hCoV-19/England/CAMB-82B14/2020|EPI_ISL_438660|2020-04-23
>hCoV-19/England/CAMB-82B32/2020|EPI_ISL_438662|2020-04-23
>hCoV-19/England/CAMB-82B50/2020|EPI_ISL_438663|2020-04-22
>hCoV-19/England/CAMB-82B6F/2020|EPI_ISL_438664|2020-04-22
>hCoV-19/England/CAMB-82B7E/2020|EPI_ISL_438665|2020-04-22
>hCoV-19/England/CAMB-82BAB/2020|EPI_ISL_438666|2020-04-25
>hCoV-19/England/CAMB-82BBA/2020|EPI_ISL_438667|2020-04-25
>hCoV-19/England/CAMB-82BD8/2020|EPI_ISL_438669|2020-04-24
>hCoV-19/England/CAMB-82C11/2020|EPI_ISL_438670|2020-04-24
>hCoV-19/England/CAMB-82C20/2020|EPI_ISL_438671|2020-04-23
>hCoV-19/England/CAMB-82C3F/2020|EPI_ISL_438672|2020-04-24
>hCoV-19/England/CAMB-82C8A/2020|EPI_ISL_438676|2020-04-22
>hCoV-19/England/CAMB-82C99/2020|EPI_ISL_438677|2020-04-23
>hCoV-19/England/CAMB-82CA8/2020|EPI_ISL_438678|2020-04-24
>hCoV-19/England/CAMB-82CC6/2020|EPI_ISL_438679|2020-04-22
>hCoV-19/England/CAMB-83481/2020|EPI_ISL_438681|2020-04-25
>hCoV-19/England/CAMB-83CF2/2020|EPI_ISL_438682|2020-04-23
>hCoV-19/England/CAMB-83D0E/2020|EPI_ISL_438683|2020-04-22
>hCoV-19/England/CAMB-83D1D/2020|EPI_ISL_438684|2020-04-22
>hCoV-19/England/CAMB-83D68/2020|EPI_ISL_438687|2020-04-23
>hCoV-19/England/CAMB-83D77/2020|EPI_ISL_438688|2020
>hCoV-19/England/CAMB-83D86/2020|EPI_ISL_438689|2020-04-23
>hCoV-19/England/CAMB-83D95/2020|EPI_ISL_438690|2020-04-24
>hCoV-19/England/CAMB-83DA4/2020|EPI_ISL_438691|2020-04-24
>hCoV-19/England/CAMB-83DB3/2020|EPI_ISL_438692|2020-04-24
>hCoV-19/England/CAMB-83DC2/2020|EPI_ISL_438693|2020-04-24
>hCoV-19/England/CAMB-83E0B/2020|EPI_ISL_438696|2020-04-25
>hCoV-19/England/CAMB-83E1A/2020|EPI_ISL_438697|2020-04-26
>hCoV-19/England/CAMB-83E29/2020|EPI_ISL_438698|2020-04-25
>hCoV-19/England/CAMB-83E38/2020|EPI_ISL_438699|2020-04-27
>hCoV-19/England/CAMB-1AD71E/2020|EPI_ISL_448000|2020-05-01
>hCoV-19/England/CAMB-1AD72D/2020|EPI_ISL_448001|2020-05-01
>hCoV-19/England/CAMB-1AD769/2020|EPI_ISL_448003|2020-04-30
>hCoV-19/England/CAMB-1AD7A5/2020|EPI_ISL_448007|2020-05-01
>hCoV-19/England/CAMB-1AD7B4/2020|EPI_ISL_448008|2020-04-30
>hCoV-19/England/CAMB-1AD7D2/2020|EPI_ISL_448010|2020-05-01
>hCoV-19/England/CAMB-1AD7E1/2020|EPI_ISL_448011|2020-05-02
>hCoV-19/England/CAMB-1AD7F0/2020|EPI_ISL_448012|2020-05-04
>hCoV-19/England/CAMB-1AD80C/2020|EPI_ISL_448013|2020-05-02
>hCoV-19/England/CAMB-1AD81B/2020|EPI_ISL_448014|2020
>hCoV-19/England/CAMB-1AD82A/2020|EPI_ISL_448015|2020-05-01
>hCoV-19/England/CAMB-1AD857/2020|EPI_ISL_448016|2020-05-02
>hCoV-19/England/CAMB-1AD866/2020|EPI_ISL_448017|2020-05-01
>hCoV-19/England/CAMB-1AD8A2/2020|EPI_ISL_448019|2020-04-30
>hCoV-19/Scotland/CVR2038/2020|EPI_ISL_448142|2020-04-09
>hCoV-19/Scotland/CVR2052/2020|EPI_ISL_448143|2020-04-08
>hCoV-19/Scotland/CVR2106/2020|EPI_ISL_448144|2020-04-10
>hCoV-19/Scotland/CVR2110/2020|EPI_ISL_448145|2020-04-10
>hCoV-19/Scotland/CVR2167/2020|EPI_ISL_448147|2020-04-11
>hCoV-19/Scotland/CVR2168/2020|EPI_ISL_448148|2020-04-11
>hCoV-19/Scotland/CVR2169/2020|EPI_ISL_448149|2020-04-11
>hCoV-19/Scotland/CVR2217/2020|EPI_ISL_448161|2020-04-12
>hCoV-19/Scotland/CVR2218/2020|EPI_ISL_448162|2020-04-11
>hCoV-19/Scotland/CVR2219/2020|EPI_ISL_448163|2020-04-12
>hCoV-19/Scotland/CVR2221/2020|EPI_ISL_448164|2020-04-12
>hCoV-19/Scotland/CVR2222/2020|EPI_ISL_448165|2020-04-12
>hCoV-19/Scotland/CVR2223/2020|EPI_ISL_448166|2020-04-12
>hCoV-19/Scotland/CVR2226/2020|EPI_ISL_448168|2020-04-12
>hCoV-19/Scotland/CVR2227/2020|EPI_ISL_448169|2020-04-12
>hCoV-19/Scotland/CVR2252/2020|EPI_ISL_448170|2020-04-12
>hCoV-19/Scotland/CVR2254/2020|EPI_ISL_448171|2020-04-12
>hCoV-19/Scotland/CVR2278/2020|EPI_ISL_448172|2020-04-12
>hCoV-19/Scotland/CVR2284/2020|EPI_ISL_448175|2020-04-13
>hCoV-19/Scotland/CVR2294/2020|EPI_ISL_448176|2020-04-12
>hCoV-19/Scotland/CVR2316/2020|EPI_ISL_448178|2020-04-13
>hCoV-19/Australia/NSW359/2020|EPI_ISL_451620|2020-04-14
>hCoV-19/Australia/NSW360/2020|EPI_ISL_451621|2020-04-17
>hCoV-19/Australia/NSW361/2020|EPI_ISL_451622|2020-04-17
>hCoV-19/Australia/NSW362/2020|EPI_ISL_451623|2020-04-15
>hCoV-19/Australia/NSW363/2020|EPI_ISL_451624|2020-04-19
>hCoV-19/Australia/NSW364/2020|EPI_ISL_451625|2020-04-14
>hCoV-19/Australia/NSW365/2020|EPI_ISL_451626|2020-04-14
>hCoV-19/Australia/NSW366/2020|EPI_ISL_451627|2020-04-14
>hCoV-19/Australia/NSW367/2020|EPI_ISL_451628|2020-04-14
>hCoV-19/Australia/NSW368/2020|EPI_ISL_451629|2020-04-14
>hCoV-19/Australia/NSW369/2020|EPI_ISL_451630|2020-04-20
>hCoV-19/Australia/NSW370/2020|EPI_ISL_451631|2020-03-26
>hCoV-19/Australia/NSW371/2020|EPI_ISL_451632|2020-03-27
>hCoV-19/Australia/NSW373/2020|EPI_ISL_451633|2020-03-22
>hCoV-19/Australia/NSW374/2020|EPI_ISL_451634|2020-03-21
>hCoV-19/Australia/NSW375/2020|EPI_ISL_451635|2020-03-08
>hCoV-19/Australia/NSW376/2020|EPI_ISL_451636|2020-03-10
>hCoV-19/Australia/NSW377/2020|EPI_ISL_451637|2020-04-13
>hCoV-19/Australia/NSW378/2020|EPI_ISL_451638|2020-04-13
>hCoV-19/Australia/NSW379/2020|EPI_ISL_451639|2020-04-13
>hCoV-19/Australia/NSW380/2020|EPI_ISL_451640|2020-04-13
>hCoV-19/Australia/NSW381/2020|EPI_ISL_451641|2020-04-06
>hCoV-19/Australia/NSW382/2020|EPI_ISL_451642|2020-04-21
>hCoV-19/Australia/NSW383/2020|EPI_ISL_451643|2020-04-07
>hCoV-19/Poland/Pom3/2020|EPI_ISL_451644|2020-05-02
>hCoV-19/Poland/Pom4/2020|EPI_ISL_451645|2020-05-02
>hCoV-19/Poland/Pom5/2020|EPI_ISL_451646|2020-04-22
>hCoV-19/Poland/Pom6/2020|EPI_ISL_451647|2020-04-23
>hCoV-19/Poland/Pom7/2020|EPI_ISL_451648|2020-04-26
>hCoV-19/Poland/Pom8/2020|EPI_ISL_451649|2020-04-27
>hCoV-19/Poland/Pom9/2020|EPI_ISL_451650|2020-04-27
>hCoV-19/Poland/Pom11/2020|EPI_ISL_451652|2020-04-30
>hCoV-19/Poland/Pom12/2020|EPI_ISL_451653|2020-05-04
>hCoV-19/Poland/Pom13/2020|EPI_ISL_451654|2020-05-04
>hCoV-19/Poland/Sla1/2020|EPI_ISL_451655|2020-05-05
>hCoV-19/Poland/Sla2/2020|EPI_ISL_451656|2020-05-05
>hCoV-19/Poland/Sla3/2020|EPI_ISL_451657|2020-05-05
>hCoV-19/Poland/Sla4/2020|EPI_ISL_451658|2020-05-05
>hCoV-19/Poland/Sla5/2020|EPI_ISL_451659|2020-05-05
>hCoV-19/Poland/Sla6/2020|EPI_ISL_451660|2020-05-05
>hCoV-19/Poland/Sla7/2020|EPI_ISL_451661|2020-05-05
>hCoV-19/Switzerland/100848/2020|EPI_ISL_451794|2020-03-25
>hCoV-19/Switzerland/101129/2020|EPI_ISL_451796|2020-03-30
>hCoV-19/Switzerland/101130/2020|EPI_ISL_451797|2020-03-30
>hCoV-19/Switzerland/101131/2020|EPI_ISL_451798|2020-03-30
>hCoV-19/England/09c/2020|EPI_ISL_412116|2020-02-09
>hCoV-19/England/20129126204/2020|EPI_ISL_424101|2020-03-12
>hCoV-19/England/20129133804/2020|EPI_ISL_424104|2020-03-12
>hCoV-19/England/20129142604/2020|EPI_ISL_424108|2020-03-12
>hCoV-19/England/20129143204/2020|EPI_ISL_424110|2020-03-11
>hCoV-19/England/20129148904/2020|EPI_ISL_424117|2020-03-12
>hCoV-19/England/20129158804/2020|EPI_ISL_424119|2020-03-21
>hCoV-19/England/20129160704/2020|EPI_ISL_424121|2020-03-21
>hCoV-19/England/20129163604/2020|EPI_ISL_424126|2020-03-21
>hCoV-19/England/20129171402/2020|EPI_ISL_424137|2020-03-20
>hCoV-19/England/20129171604/2020|EPI_ISL_424140|2020-03-21
>hCoV-19/England/20129174804/2020|EPI_ISL_424152|2020-03-20
>hCoV-19/England/20129176002/2020|EPI_ISL_424154|2020-03-20
>hCoV-19/England/20129176804/2020|EPI_ISL_424159|2020-03-21
>hCoV-19/England/20129177304/2020|EPI_ISL_424160|2020-03-22
>hCoV-19/USA/WA-UW-1620/2020|EPI_ISL_424166|2020-03-19
>hCoV-19/USA/WA-UW-1616/2020|EPI_ISL_424167|2020-03-19
>hCoV-19/USA/WA-UW-1538/2020|EPI_ISL_424169|2020-03-19
>hCoV-19/USA/WA-UW-1595/2020|EPI_ISL_424170|2020-03-19
>hCoV-19/USA/WA-UW-1575/2020|EPI_ISL_424172|2020-03-19
>hCoV-19/USA/IL-UW-1311/2020|EPI_ISL_424173|2020-03-14
>hCoV-19/USA/CT-UW-1365/2020|EPI_ISL_424174|2020-03-13
>hCoV-19/USA/WA-UW-1362/2020|EPI_ISL_424175|2020-03-17
>hCoV-19/USA/WA-UW-1472/2020|EPI_ISL_424176|2020-03-17
>hCoV-19/USA/WA-UW-1342/2020|EPI_ISL_424178|2020-03-17
>hCoV-19/USA/WA-UW-1341/2020|EPI_ISL_424179|2020-03-17
>hCoV-19/Australia/VIC397/2020|EPI_ISL_426700|2020-03-24
>hCoV-19/Australia/VIC398/2020|EPI_ISL_426701|2020-03-24
>hCoV-19/Australia/VIC399/2020|EPI_ISL_426702|2020-03-24
>hCoV-19/Australia/VIC400/2020|EPI_ISL_426703|2020-03-24
>hCoV-19/Australia/VIC401/2020|EPI_ISL_426704|2020-03-24
>hCoV-19/Australia/VIC402/2020|EPI_ISL_426705|2020-03-24
>hCoV-19/Australia/VIC403/2020|EPI_ISL_426706|2020-03-22
>hCoV-19/Australia/VIC404/2020|EPI_ISL_426707|2020-03-24
>hCoV-19/Australia/VIC407/2020|EPI_ISL_426709|2020-03-25
>hCoV-19/Australia/VIC409/2020|EPI_ISL_426711|2020-03-26
>hCoV-19/Australia/VIC414/2020|EPI_ISL_426714|2020-03-26
>hCoV-19/Australia/VIC415/2020|EPI_ISL_426715|2020-03-25
>hCoV-19/Australia/VIC417/2020|EPI_ISL_426717|2020-03-25
>hCoV-19/Australia/VIC418/2020|EPI_ISL_426718|2020-03-25
>hCoV-19/Australia/VIC420/2020|EPI_ISL_426720|2020-03-25
>hCoV-19/Australia/VIC421/2020|EPI_ISL_426721|2020-03-25
>hCoV-19/Australia/VIC439/2020|EPI_ISL_426736|2020-03-26
>hCoV-19/Australia/VIC440/2020|EPI_ISL_426737|2020-03-26
>hCoV-19/Australia/VIC441/2020|EPI_ISL_426738|2020-03-27
>hCoV-19/Australia/VIC443/2020|EPI_ISL_426740|2020-03-27
>hCoV-19/Australia/VIC444/2020|EPI_ISL_426741|2020-03-27
>hCoV-19/Australia/VIC446/2020|EPI_ISL_426742|2020-03-27
>hCoV-19/Australia/VIC447/2020|EPI_ISL_426743|2020-03-27
>hCoV-19/Australia/VIC449/2020|EPI_ISL_426745|2020-03-24
>hCoV-19/Australia/VIC450/2020|EPI_ISL_426746|2020-03-25
>hCoV-19/Australia/VIC451/2020|EPI_ISL_426747|2020-03-25
>hCoV-19/Australia/VIC456/2020|EPI_ISL_426751|2020-03-25
>hCoV-19/Australia/VIC458/2020|EPI_ISL_426752|2020-03-26
>hCoV-19/Australia/VIC461/2020|EPI_ISL_426754|2020-03-27
>hCoV-19/Australia/VIC462/2020|EPI_ISL_426755|2020-03-27
>hCoV-19/Australia/VIC463/2020|EPI_ISL_426756|2020-03-26
>hCoV-19/Australia/VIC468/2020|EPI_ISL_426761|2020-03-27
>hCoV-19/Australia/VIC471/2020|EPI_ISL_426763|2020-03-26
>hCoV-19/Australia/VIC472/2020|EPI_ISL_426764|2020-03-26
>hCoV-19/Australia/VIC492/2020|EPI_ISL_426765|2020-03-23
>hCoV-19/Australia/VIC493/2020|EPI_ISL_426766|2020-03-22
>hCoV-19/Australia/VIC494/2020|EPI_ISL_426767|2020-03-23
>hCoV-19/Australia/VIC495/2020|EPI_ISL_426768|2020-03-23
>hCoV-19/Australia/VIC496/2020|EPI_ISL_426769|2020-03-23
>hCoV-19/Australia/VIC497/2020|EPI_ISL_426770|2020-03-23
>hCoV-19/Australia/VIC498/2020|EPI_ISL_426771|2020-03-23
>hCoV-19/Australia/VIC500/2020|EPI_ISL_426772|2020-03-24
>hCoV-19/Australia/VIC503/2020|EPI_ISL_426774|2020-03-23
>hCoV-19/Australia/VIC504/2020|EPI_ISL_426775|2020-03-23
>hCoV-19/Australia/VIC505/2020|EPI_ISL_426776|2020-03-22
>hCoV-19/Australia/VIC506/2020|EPI_ISL_426777|2020-03-23
>hCoV-19/Australia/VIC509/2020|EPI_ISL_426779|2020-03-22
>hCoV-19/Australia/VIC511/2020|EPI_ISL_426781|2020-03-23
>hCoV-19/Australia/VIC516/2020|EPI_ISL_426786|2020-03-23
>hCoV-19/Australia/VIC518/2020|EPI_ISL_426788|2020-03-23
>hCoV-19/Australia/VIC520/2020|EPI_ISL_426789|2020-03-23
>hCoV-19/Australia/VIC522/2020|EPI_ISL_426790|2020-03-23
>hCoV-19/Australia/VIC525/2020|EPI_ISL_426792|2020-03-24
>hCoV-19/Australia/VIC527/2020|EPI_ISL_426793|2020-03-24
>hCoV-19/Australia/VIC530/2020|EPI_ISL_426796|2020-03-23
>hCoV-19/Australia/VIC531/2020|EPI_ISL_426797|2020-03-24
>hCoV-19/Australia/VIC532/2020|EPI_ISL_426798|2020-03-23
>hCoV-19/Australia/VIC533/2020|EPI_ISL_426799|2020-03-24
>hCoV-19/Taiwan/TSGH-15/2020|EPI_ISL_436100|2020-03-19
>hCoV-19/Taiwan/TSGH-16/2020|EPI_ISL_436101|2020-03-19
>hCoV-19/Taiwan/TSGH-17/2020|EPI_ISL_436102|2020-03-19
>hCoV-19/Taiwan/TSGH-18/2020|EPI_ISL_436103|2020-03-24
>hCoV-19/Taiwan/TSGH-19/2020|EPI_ISL_436104|2020-03-26
>hCoV-19/Taiwan/TSGH-21/2020|EPI_ISL_436106|2020-03-30
>hCoV-19/Taiwan/TSGH-22/2020|EPI_ISL_436107|2020-03-31
>hCoV-19/Taiwan/TSGH-23/2020|EPI_ISL_436108|2020-04-02
>hCoV-19/Australia/VIC1255/2020|EPI_ISL_436119|2020-04-11
>hCoV-19/Australia/VIC1256/2020|EPI_ISL_436120|2020-04-11
>hCoV-19/Australia/VIC1273/2020|EPI_ISL_436131|2020-04-14
>hCoV-19/England/CAMB-83E47/2020|EPI_ISL_438700|2020-04-24
>hCoV-19/England/CAMB-83E56/2020|EPI_ISL_438701|2020-04-27
>hCoV-19/England/CAMB-83E74/2020|EPI_ISL_438702|2020-04-23
>hCoV-19/England/CAMB-83E83/2020|EPI_ISL_438703|2020-04-25
>hCoV-19/England/CAMB-83F71/2020|EPI_ISL_438715|2020-04-25
>hCoV-19/England/CAMB-83F80/2020|EPI_ISL_438716|2020-04-26
>hCoV-19/England/CAMB-83FAE/2020|EPI_ISL_438717|2020-04-25
>hCoV-19/England/CAMB-83FCC/2020|EPI_ISL_438719|2020-04-25
>hCoV-19/England/CAMB-83FDB/2020|EPI_ISL_438720|2020-04-25
>hCoV-19/England/CAMB-83FEA/2020|EPI_ISL_438721|2020-04-27
>hCoV-19/England/CAMB-83FF9/2020|EPI_ISL_438722|2020-04-25
>hCoV-19/England/CAMB-84022/2020|EPI_ISL_438725|2020-04-27
>hCoV-19/England/CAMB-84031/2020|EPI_ISL_438726|2020-04-26
>hCoV-19/England/CAMB-840B9/2020|EPI_ISL_438733|2020-04-26
>hCoV-19/England/CAMB-840D7/2020|EPI_ISL_438735|2020-04-26
>hCoV-19/England/CAMB-840E6/2020|EPI_ISL_438736|2020-04-26
>hCoV-19/England/CAMB-840F5/2020|EPI_ISL_438737|2020-04-26
>hCoV-19/England/CAMB-8413E/2020|EPI_ISL_438740|2020-04-24
>hCoV-19/England/CAMB-8464E/2020|EPI_ISL_438744|2020-04-27
>hCoV-19/England/CAMB-8465D/2020|EPI_ISL_438745|2020-04-26
>hCoV-19/England/CAMB-8466C/2020|EPI_ISL_438746|2020-04-27
>hCoV-19/England/CAMB-8467B/2020|EPI_ISL_438747|2020-04-27
>hCoV-19/England/CAMB-8468A/2020|EPI_ISL_438748|2020-04-27
>hCoV-19/Scotland/CVR1003/2020|EPI_ISL_438749|2020-03-29
>hCoV-19/Scotland/CVR1030/2020|EPI_ISL_438754|2020-03-30
>hCoV-19/Scotland/CVR1043/2020|EPI_ISL_438757|2020-03-29
>hCoV-19/Scotland/CVR1059/2020|EPI_ISL_438760|2020-03-29
>hCoV-19/Scotland/CVR1076/2020|EPI_ISL_438762|2020-03-29
>hCoV-19/Scotland/CVR1079/2020|EPI_ISL_438763|2020-03-29
>hCoV-19/Scotland/CVR1086/2020|EPI_ISL_438764|2020-03-29
>hCoV-19/Scotland/CVR1113/2020|EPI_ISL_438766|2020-03-29
>hCoV-19/Scotland/CVR1217/2020|EPI_ISL_438775|2020-03-30
>hCoV-19/Scotland/CVR1221/2020|EPI_ISL_438776|2020-03-30
>hCoV-19/Scotland/CVR1249/2020|EPI_ISL_438779|2020-03-31
>hCoV-19/Scotland/CVR1263/2020|EPI_ISL_438783|2020-03-31
>hCoV-19/Scotland/CVR1268/2020|EPI_ISL_438784|2020-03-31
>hCoV-19/Scotland/CVR1402/2020|EPI_ISL_438798|2020-04-01
>hCoV-19/England/CAMB-1B003B/2020|EPI_ISL_448100|2020-05-08
>hCoV-19/England/CAMB-1B004A/2020|EPI_ISL_448101|2020-05-07
>hCoV-19/England/CAMB-1B0059/2020|EPI_ISL_448102|2020-05-07
>hCoV-19/England/CAMB-1B0068/2020|EPI_ISL_448103|2020-05-08
>hCoV-19/England/CAMB-1B0086/2020|EPI_ISL_448105|2020
>hCoV-19/England/CAMB-1B0095/2020|EPI_ISL_448106|2020-05-07
>hCoV-19/England/CAMB-1B00A4/2020|EPI_ISL_448107|2020-05-07
>hCoV-19/England/CAMB-1B00D1/2020|EPI_ISL_448108|2020-05-07
>hCoV-19/England/CAMB-1B00FF/2020|EPI_ISL_448109|2020-05-07
>hCoV-19/England/CAMB-1B011A/2020|EPI_ISL_448111|2020-05-06
>hCoV-19/England/CAMB-1B01CF/2020|EPI_ISL_448113|2020-05-06
>hCoV-19/England/CAMB-1B05D2/2020|EPI_ISL_448114|2020-05-06
>hCoV-19/Scotland/CVR1501/2020|EPI_ISL_448117|2020-04-03
>hCoV-19/Scotland/CVR1584/2020|EPI_ISL_448118|2020-04-05
>hCoV-19/Scotland/CVR1601/2020|EPI_ISL_448119|2020-04-02
>hCoV-19/Scotland/CVR1623/2020|EPI_ISL_448120|2020-04-05
>hCoV-19/Scotland/CVR1624/2020|EPI_ISL_448121|2020-04-05
>hCoV-19/Scotland/CVR1713/2020|EPI_ISL_448127|2020-04-06
>hCoV-19/Scotland/CVR1718/2020|EPI_ISL_448128|2020-04-06
>hCoV-19/Scotland/CVR1805/2020|EPI_ISL_448129|2020-04-07
>hCoV-19/Scotland/CVR1806/2020|EPI_ISL_448130|2020-04-07
>hCoV-19/Scotland/CVR1822/2020|EPI_ISL_448131|2020-04-07
>hCoV-19/Scotland/CVR1825/2020|EPI_ISL_448132|2020-04-07
>hCoV-19/Scotland/CVR1840/2020|EPI_ISL_448134|2020-04-07
>hCoV-19/Scotland/CVR1902/2020|EPI_ISL_448136|2020-04-08
>hCoV-19/Scotland/CVR1927/2020|EPI_ISL_448138|2020-04-08
>hCoV-19/Scotland/CVR1953/2020|EPI_ISL_448139|2020-04-08
>hCoV-19/Scotland/CVR2173/2020|EPI_ISL_448151|2020-04-11
>hCoV-19/Scotland/CVR2174/2020|EPI_ISL_448152|2020-04-11
>hCoV-19/Scotland/CVR2182/2020|EPI_ISL_448153|2020-04-11
>hCoV-19/Scotland/CVR2193/2020|EPI_ISL_448154|2020-04-11
>hCoV-19/Scotland/CVR2196/2020|EPI_ISL_448157|2020-04-11
>hCoV-19/Scotland/CVR2198/2020|EPI_ISL_448158|2020-04-11
>hCoV-19/Scotland/CVR2345/2020|EPI_ISL_448182|2020-04-13
>hCoV-19/Scotland/CVR2388/2020|EPI_ISL_448183|2020-04-14
>hCoV-19/Scotland/CVR2414/2020|EPI_ISL_448184|2020-04-14
>hCoV-19/Scotland/CVR2415/2020|EPI_ISL_448185|2020-04-14
>hCoV-19/Scotland/CVR2433/2020|EPI_ISL_448187|2020-04-14
>hCoV-19/Scotland/CVR2526/2020|EPI_ISL_448188|2020-04-15
>hCoV-19/Scotland/CVR2686/2020|EPI_ISL_448189|2020-04-17
>hCoV-19/Scotland/CVR2742/2020|EPI_ISL_448190|2020-04-18
>hCoV-19/Scotland/CVR2771/2020|EPI_ISL_448193|2020-04-20
>hCoV-19/Scotland/CVR2817/2020|EPI_ISL_448195|2020-04-21
>hCoV-19/Scotland/CVR2840/2020|EPI_ISL_448196|2020-04-21
>hCoV-19/Scotland/CVR2842/2020|EPI_ISL_448197|2020-04-21
>hCoV-19/Scotland/CVR2852/2020|EPI_ISL_448198|2020-04-21
>hCoV-19/Scotland/CVR2853/2020|EPI_ISL_448199|2020-04-21
>hCoV-19/Switzerland/100117/2020|EPI_ISL_451701|2020-03-16
>hCoV-19/Switzerland/100118/2020|EPI_ISL_451702|2020-03-16
>hCoV-19/Switzerland/100119/2020|EPI_ISL_451703|2020-03-16
>hCoV-19/Switzerland/100120/2020|EPI_ISL_451704|2020-03-16
>hCoV-19/Switzerland/100121/2020|EPI_ISL_451705|2020-03-16
>hCoV-19/Switzerland/100122/2020|EPI_ISL_451706|2020-03-16
>hCoV-19/Switzerland/100123/2020|EPI_ISL_451707|2020-03-16
>hCoV-19/Switzerland/100124/2020|EPI_ISL_451708|2020-03-16
>hCoV-19/Switzerland/100125/2020|EPI_ISL_451709|2020-03-16
>hCoV-19/Switzerland/100127/2020|EPI_ISL_451711|2020-03-16
>hCoV-19/Switzerland/100128/2020|EPI_ISL_451712|2020-03-16
>hCoV-19/Switzerland/100129/2020|EPI_ISL_451713|2020-03-16
>hCoV-19/Switzerland/100130/2020|EPI_ISL_451714|2020-03-16
>hCoV-19/Switzerland/100132/2020|EPI_ISL_451716|2020-03-16
>hCoV-19/Switzerland/100133/2020|EPI_ISL_451717|2020-03-16
>hCoV-19/Switzerland/100134/2020|EPI_ISL_451718|2020-03-15
>hCoV-19/Switzerland/100135/2020|EPI_ISL_451719|2020-03-16
>hCoV-19/Switzerland/100136/2020|EPI_ISL_451720|2020-03-16
>hCoV-19/Switzerland/100137/2020|EPI_ISL_451721|2020-03-16
>hCoV-19/Switzerland/100138/2020|EPI_ISL_451722|2020-03-15
>hCoV-19/Switzerland/100139/2020|EPI_ISL_451723|2020-03-16
>hCoV-19/Switzerland/100140/2020|EPI_ISL_451724|2020-03-16
>hCoV-19/Switzerland/100141/2020|EPI_ISL_451725|2020-03-15
>hCoV-19/Switzerland/100143/2020|EPI_ISL_451727|2020-03-16
>hCoV-19/Switzerland/100144/2020|EPI_ISL_451728|2020-03-16
>hCoV-19/Switzerland/100146/2020|EPI_ISL_451730|2020-03-16
>hCoV-19/Switzerland/100147/2020|EPI_ISL_451731|2020-03-16
>hCoV-19/Switzerland/100148/2020|EPI_ISL_451732|2020-03-16
>hCoV-19/Switzerland/100150/2020|EPI_ISL_451734|2020-03-16
>hCoV-19/Switzerland/100154/2020|EPI_ISL_451738|2020-03-16
>hCoV-19/Switzerland/100790/2020|EPI_ISL_451740|2020-03-25
>hCoV-19/Switzerland/100791/2020|EPI_ISL_451741|2020-03-25
>hCoV-19/Switzerland/100792/2020|EPI_ISL_451742|2020-03-25
>hCoV-19/Switzerland/100794/2020|EPI_ISL_451744|2020-03-25
>hCoV-19/Switzerland/100795/2020|EPI_ISL_451745|2020-03-25
>hCoV-19/Switzerland/100796/2020|EPI_ISL_451746|2020-03-25
>hCoV-19/Switzerland/100797/2020|EPI_ISL_451747|2020-03-25
>hCoV-19/Switzerland/100798/2020|EPI_ISL_451748|2020-03-25
>hCoV-19/Switzerland/100799/2020|EPI_ISL_451749|2020-03-25
>hCoV-19/Switzerland/100800/2020|EPI_ISL_451750|2020-03-25
>hCoV-19/Switzerland/100801/2020|EPI_ISL_451751|2020-03-25
>hCoV-19/Switzerland/100802/2020|EPI_ISL_451752|2020-03-25
>hCoV-19/Switzerland/100803/2020|EPI_ISL_451753|2020-03-25
>hCoV-19/Switzerland/100804/2020|EPI_ISL_451754|2020-03-25
>hCoV-19/Switzerland/100805/2020|EPI_ISL_451755|2020-03-25
>hCoV-19/Switzerland/100806/2020|EPI_ISL_451756|2020-03-25
>hCoV-19/Switzerland/100808/2020|EPI_ISL_451758|2020-03-26
>hCoV-19/Switzerland/100809/2020|EPI_ISL_451759|2020-03-26
>hCoV-19/Switzerland/100810/2020|EPI_ISL_451760|2020-03-26
>hCoV-19/Switzerland/100811/2020|EPI_ISL_451761|2020-03-26
>hCoV-19/Switzerland/100813/2020|EPI_ISL_451763|2020-03-26
>hCoV-19/Switzerland/100814/2020|EPI_ISL_451764|2020-03-26
>hCoV-19/Switzerland/100815/2020|EPI_ISL_451765|2020-03-26
>hCoV-19/Switzerland/100816/2020|EPI_ISL_451766|2020-03-26
>hCoV-19/Switzerland/100817/2020|EPI_ISL_451767|2020-03-26
>hCoV-19/Switzerland/100820/2020|EPI_ISL_451769|2020-03-26
>hCoV-19/Switzerland/100821/2020|EPI_ISL_451770|2020-03-26
>hCoV-19/Switzerland/100822/2020|EPI_ISL_451771|2020-03-26
>hCoV-19/Switzerland/100823/2020|EPI_ISL_451772|2020-03-26
>hCoV-19/Switzerland/100824/2020|EPI_ISL_451773|2020-03-26
>hCoV-19/Switzerland/100827/2020|EPI_ISL_451776|2020-03-26
>hCoV-19/Switzerland/100828/2020|EPI_ISL_451777|2020-03-26
>hCoV-19/Switzerland/100830/2020|EPI_ISL_451778|2020-03-26
>hCoV-19/Switzerland/100832/2020|EPI_ISL_451780|2020-03-25
>hCoV-19/Switzerland/100833/2020|EPI_ISL_451781|2020-03-25
>hCoV-19/Switzerland/100834/2020|EPI_ISL_451782|2020-03-25
>hCoV-19/Switzerland/100836/2020|EPI_ISL_451784|2020-03-25
>hCoV-19/Switzerland/100837/2020|EPI_ISL_451785|2020-03-25
>hCoV-19/Switzerland/100838/2020|EPI_ISL_451786|2020-03-25
>hCoV-19/Switzerland/100839/2020|EPI_ISL_451787|2020-03-25
>hCoV-19/Switzerland/100840/2020|EPI_ISL_451788|2020-03-25
>hCoV-19/Switzerland/100842/2020|EPI_ISL_451789|2020-03-25
>hCoV-19/Switzerland/100843/2020|EPI_ISL_451790|2020-03-25
>hCoV-19/Switzerland/100844/2020|EPI_ISL_451791|2020-03-25
>hCoV-19/Switzerland/100845/2020|EPI_ISL_451792|2020-03-25
>hCoV-19/Switzerland/100846/2020|EPI_ISL_451793|2020-03-25
>hCoV-19/Switzerland/101132/2020|EPI_ISL_451799|2020-03-30
>hCoV-19/Wales/PHWC-25779/2020|EPI_ISL_422039|2020-03-24
>hCoV-19/Wales/PHWC-26D1C/2020|EPI_ISL_422040|2020-03-30
>hCoV-19/Wales/PHWC-25C3E/2020|EPI_ISL_422041|2020-03-25
>hCoV-19/Wales/PHWC-264BD/2020|EPI_ISL_422042|2020-03-28
>hCoV-19/Wales/PHWC-269DC/2020|EPI_ISL_422043|2020-03-29
>hCoV-19/Wales/PHWC-26E19/2020|EPI_ISL_422044|2020-03-29
>hCoV-19/Wales/PHWC-25AF8/2020|EPI_ISL_422045|2020-03-24
>hCoV-19/Wales/PHWC-2666C/2020|EPI_ISL_422046|2020-03-27
>hCoV-19/Wales/PHWC-26F34/2020|EPI_ISL_422047|2020-03-30
>hCoV-19/Wales/PHWC-26918/2020|EPI_ISL_422048|2020-03-27
>hCoV-19/Wales/PHWC-2575B/2020|EPI_ISL_422049|2020-03-24
>hCoV-19/Wales/PHWC-26DEF/2020|EPI_ISL_422050|2020-03-30
>hCoV-19/Wales/PHWC-26A51/2020|EPI_ISL_422051|2020-03-30
>hCoV-19/Wales/PHWC-26884/2020|EPI_ISL_422052|2020-03-27
>hCoV-19/Wales/PHWC-25ABC/2020|EPI_ISL_422053|2020-03-24
>hCoV-19/Wales/PHWC-26F9E/2020|EPI_ISL_422054|2020-03-29
>hCoV-19/Wales/PHWC-25E47/2020|EPI_ISL_422055|2020-03-25
>hCoV-19/Wales/PHWC-26CC4/2020|EPI_ISL_422056|2020-03-28
>hCoV-19/Wales/PHWC-268A2/2020|EPI_ISL_422057|2020-03-28
>hCoV-19/Wales/PHWC-26E91/2020|EPI_ISL_422058|2020-03-30
>hCoV-19/Wales/PHWC-26FE9/2020|EPI_ISL_422059|2020-03-30
>hCoV-19/Wales/PHWC-25FEA/2020|EPI_ISL_422060|2020-03-25
>hCoV-19/Wales/PHWC-26E82/2020|EPI_ISL_422061|2020-03-30
>hCoV-19/Wales/PHWC-269AF/2020|EPI_ISL_422062|2020-03-30
>hCoV-19/Wales/PHWC-25B6E/2020|EPI_ISL_422063|2020-03-25
>hCoV-19/Wales/PHWC-25C01/2020|EPI_ISL_422064|2020-03-25
>hCoV-19/Wales/PHWC-2566D/2020|EPI_ISL_422065|2020-03-24
>hCoV-19/Wales/PHWC-2573D/2020|EPI_ISL_422066|2020-03-24
>hCoV-19/Wales/PHWC-25973/2020|EPI_ISL_422067|2020-03-24
>hCoV-19/Wales/PHWC-26EFB/2020|EPI_ISL_422068|2020-03-30
>hCoV-19/Wales/PHWC-270A9/2020|EPI_ISL_422069|2020-03-29
>hCoV-19/Wales/PHWC-26839/2020|EPI_ISL_422070|2020-03-27
>hCoV-19/Wales/PHWC-257B5/2020|EPI_ISL_422071|2020-03-24
>hCoV-19/Wales/PHWC-26F52/2020|EPI_ISL_422072|2020-03-28
>hCoV-19/Wales/PHWC-260AA/2020|EPI_ISL_422073|2020-03-24
>hCoV-19/Wales/PHWC-26954/2020|EPI_ISL_422074|2020-03-27
>hCoV-19/Wales/PHWC-26E46/2020|EPI_ISL_422075|2020-03-29
>hCoV-19/Wales/PHWC-26D3A/2020|EPI_ISL_422076|2020-03-30
>hCoV-19/Wales/PHWC-26A42/2020|EPI_ISL_422077|2020-03-29
>hCoV-19/Wales/PHWC-26013/2020|EPI_ISL_422078|2020-03-25
>hCoV-19/Wales/PHWC-26E37/2020|EPI_ISL_422079|2020-03-29
>hCoV-19/Wales/PHWC-26E55/2020|EPI_ISL_422080|2020-03-29
>hCoV-19/Wales/PHWC-26EBF/2020|EPI_ISL_422081|2020-03-30
>hCoV-19/Wales/PHWC-26BD6/2020|EPI_ISL_422082|2020-03-28
>hCoV-19/Wales/PHWC-2624A/2020|EPI_ISL_422083|2020-03-27
>hCoV-19/Wales/PHWC-26DB2/2020|EPI_ISL_422084|2020-03-30
>hCoV-19/Wales/PHWC-25FAE/2020|EPI_ISL_422085|2020-03-25
>hCoV-19/Wales/PHWC-2708B/2020|EPI_ISL_422086|2020-03-29
>hCoV-19/Wales/PHWC-26CA6/2020|EPI_ISL_422087|2020-03-28
>hCoV-19/Wales/PHWC-26DC1/2020|EPI_ISL_422088|2020-03-30
>hCoV-19/Wales/PHWC-26DA3/2020|EPI_ISL_422089|2020-03-30
>hCoV-19/Wales/PHWC-26ECE/2020|EPI_ISL_422090|2020-03-30
>hCoV-19/Wales/PHWC-264DB/2020|EPI_ISL_422091|2020-03-28
>hCoV-19/Wales/PHWC-26857/2020|EPI_ISL_422092|2020-03-27
>hCoV-19/Wales/PHWC-2707C/2020|EPI_ISL_422093|2020-03-29
>hCoV-19/Wales/PHWC-2617A/2020|EPI_ISL_422094|2020-03-25
>hCoV-19/Wales/PHWC-2705E/2020|EPI_ISL_422095|2020-03-28
>hCoV-19/Wales/PHWC-2675A/2020|EPI_ISL_422096|2020-03-28
>hCoV-19/Wales/PHWC-26D0D/2020|EPI_ISL_422097|2020-03-30
>hCoV-19/Wales/PHWC-26848/2020|EPI_ISL_422098|2020-03-27
>hCoV-19/Wales/PHWC-27021/2020|EPI_ISL_422099|2020-03-28
>hCoV-19/Sweden/RV-FOI-1/2020|EPI_ISL_424703|2020-03-15
>hCoV-19/Mexico/Chihuahua-IMSS_01/2020|EPI_ISL_424731|2020-03-13
>hCoV-19/Australia/VIC425/2020|EPI_ISL_426725|2020-03-25
>hCoV-19/Australia/VIC427/2020|EPI_ISL_426727|2020-03-25
>hCoV-19/Australia/VIC429/2020|EPI_ISL_426729|2020-03-26
>hCoV-19/Australia/VIC430/2020|EPI_ISL_426730|2020-03-26
>hCoV-19/Australia/VIC433/2020|EPI_ISL_426732|2020-03-25
>hCoV-19/Australia/VIC434/2020|EPI_ISL_426733|2020-03-25
>hCoV-19/Australia/VIC437/2020|EPI_ISL_426734|2020-03-26
>hCoV-19/Australia/VIC438/2020|EPI_ISL_426735|2020-03-26
>hCoV-19/England/CAMB-7C290/2020|EPI_ISL_434020|2020-04-15
>hCoV-19/England/CAMB-7C2AF/2020|EPI_ISL_434021|2020-04-14
>hCoV-19/England/CAMB-7C2BE/2020|EPI_ISL_434022|2020-04-14
>hCoV-19/England/CAMB-7C2DC/2020|EPI_ISL_434024|2020-04-15
>hCoV-19/England/CAMB-7C315/2020|EPI_ISL_434027|2020-04-14
>hCoV-19/England/CAMB-7C333/2020|EPI_ISL_434029|2020-04-14
>hCoV-19/England/CAMB-7C360/2020|EPI_ISL_434032|2020-04-14
>hCoV-19/England/CAMB-7C38E/2020|EPI_ISL_434034|2020-04-14
>hCoV-19/England/CAMB-7C39D/2020|EPI_ISL_434035|2020-04-13
>hCoV-19/England/CAMB-7C3AC/2020|EPI_ISL_434036|2020-04-14
>hCoV-19/England/CAMB-7C3CA/2020|EPI_ISL_434038|2020-04-14
>hCoV-19/England/CAMB-7E119/2020|EPI_ISL_434041|2020-04-16
>hCoV-19/England/CAMB-7E155/2020|EPI_ISL_434045|2020-04-16
>hCoV-19/England/CAMB-7E164/2020|EPI_ISL_434046|2020-04-15
>hCoV-19/England/CAMB-7E1BF/2020|EPI_ISL_434047|2020-04-16
>hCoV-19/England/CAMB-7E1DD/2020|EPI_ISL_434049|2020-04-16
>hCoV-19/England/CAMB-7E1FB/2020|EPI_ISL_434051|2020-04-16
>hCoV-19/England/CAMB-7E234/2020|EPI_ISL_434054|2020-04-15
>hCoV-19/USA/WA-S306/2020|EPI_ISL_434066|2020-04-02
>hCoV-19/USA/WA-S309/2020|EPI_ISL_434069|2020-04-03
>hCoV-19/USA/WA-S320/2020|EPI_ISL_434080|2020-04-01
>hCoV-19/USA/WA-S321/2020|EPI_ISL_434081|2020-03-30
>hCoV-19/USA/WA-S322/2020|EPI_ISL_434082|2020-03-31
>hCoV-19/USA/WA-S323/2020|EPI_ISL_434083|2020-04-02
>hCoV-19/USA/WA-S324/2020|EPI_ISL_434084|2020-04-01
>hCoV-19/USA/WA-S325/2020|EPI_ISL_434085|2020-04-03
>hCoV-19/USA/WA-S326/2020|EPI_ISL_434086|2020-04-01
>hCoV-19/USA/WA-S327/2020|EPI_ISL_434087|2020-04-05
>hCoV-19/USA/WA-S328/2020|EPI_ISL_434088|2020-04-03
>hCoV-19/USA/WA-S329/2020|EPI_ISL_434089|2020-04-01
>hCoV-19/USA/WA-S330/2020|EPI_ISL_434090|2020-04-02
>hCoV-19/USA/WA-S331/2020|EPI_ISL_434091|2020-04-02
>hCoV-19/USA/WA-S332/2020|EPI_ISL_434092|2020-04-02
>hCoV-19/USA/WA-S333/2020|EPI_ISL_434093|2020-04-04
>hCoV-19/USA/WA-S334/2020|EPI_ISL_434094|2020-04-04
>hCoV-19/USA/WA-S335/2020|EPI_ISL_434095|2020-04-02
>hCoV-19/USA/WA-S336/2020|EPI_ISL_434096|2020-04-03
>hCoV-19/USA/WA-S337/2020|EPI_ISL_434097|2020-04-01
>hCoV-19/USA/WA-S338/2020|EPI_ISL_434098|2020-04-02
>hCoV-19/USA/WA-S339/2020|EPI_ISL_434099|2020-04-02
>hCoV-19/USA/CA-CZB-1039/2020|EPI_ISL_436680|2020-04-04
>hCoV-19/USA/CA-CZB-1040/2020|EPI_ISL_436681|2020-04-03
>hCoV-19/USA/CA-CZB-1041/2020|EPI_ISL_436682|2020-04-08
>hCoV-19/USA/CA-CZB-1042/2020|EPI_ISL_436683|2020-04-20
>hCoV-19/South Africa/KRISP-04/2020|EPI_ISL_436684|2020-03-31
>hCoV-19/South Africa/KRISP-045/2020|EPI_ISL_436686|2020-03-27
>hCoV-19/Australia/VIC550/2020|EPI_ISL_436689|2020-03-23
>hCoV-19/England/CAMB-83EA1/2020|EPI_ISL_438704|2020-04-25
>hCoV-19/England/CAMB-83EB0/2020|EPI_ISL_438705|2020-04-25
>hCoV-19/England/CAMB-83EDE/2020|EPI_ISL_438707|2020-04-25
>hCoV-19/England/CAMB-83EED/2020|EPI_ISL_438708|2020-04-26
>hCoV-19/England/CAMB-83EFC/2020|EPI_ISL_438709|2020-04-26
>hCoV-19/England/CAMB-83F17/2020|EPI_ISL_438710|2020-04-25
>hCoV-19/England/CAMB-83F35/2020|EPI_ISL_438711|2020-04-27
>hCoV-19/England/CAMB-83F44/2020|EPI_ISL_438712|2020-04-26
>hCoV-19/England/CAMB-83F53/2020|EPI_ISL_438713|2020-04-25
>hCoV-19/England/CAMB-83F62/2020|EPI_ISL_438714|2020-04-26
>hCoV-19/Wales/PHWC-2D6ED/2020|EPI_ISL_446014|2020-04-04
>hCoV-19/Wales/PHWC-2DDAC/2020|EPI_ISL_446024|2020-04-14
>hCoV-19/Wales/PHWC-2DDF7/2020|EPI_ISL_446025|2020-04-14
>hCoV-19/Wales/PHWC-2DE21/2020|EPI_ISL_446027|2020-04-14
>hCoV-19/Wales/PHWC-2DE6D/2020|EPI_ISL_446031|2020-04-15
>hCoV-19/Wales/PHWC-2DF00/2020|EPI_ISL_446039|2020-04-09
>hCoV-19/Wales/PHWC-2DF1F/2020|EPI_ISL_446040|2020-04-09
>hCoV-19/Wales/PHWC-2DF6A/2020|EPI_ISL_446042|2020-04-10
>hCoV-19/Wales/PHWC-2DF97/2020|EPI_ISL_446043|2020-04-10
>hCoV-19/Wales/PHWC-2DFA6/2020|EPI_ISL_446044|2020-04-10
>hCoV-19/Wales/PHWC-2E01B/2020|EPI_ISL_446047|2020-04-10
>hCoV-19/Wales/PHWC-2E127/2020|EPI_ISL_446060|2020-04-11
>hCoV-19/Wales/PHWC-2E136/2020|EPI_ISL_446061|2020-04-11
>hCoV-19/Wales/PHWC-2E172/2020|EPI_ISL_446064|2020-04-07
>hCoV-19/Wales/PHWC-2E1AF/2020|EPI_ISL_446067|2020-04-07
>hCoV-19/Wales/PHWC-2E1BE/2020|EPI_ISL_446068|2020-04-07
>hCoV-19/Wales/PHWC-2E206/2020|EPI_ISL_446072|2020-04-07
>hCoV-19/Wales/PHWC-2E28E/2020|EPI_ISL_446079|2020-04-07
>hCoV-19/Wales/PHWC-2E29D/2020|EPI_ISL_446080|2020-04-07
>hCoV-19/Wales/PHWC-2E2CA/2020|EPI_ISL_446083|2020-04-16
>hCoV-19/England/OXON-AE07D/2020|EPI_ISL_448659|2020
>hCoV-19/England/OXON-AE09B/2020|EPI_ISL_448660|2020
>hCoV-19/England/OXON-AE0B9/2020|EPI_ISL_448661|2020
>hCoV-19/England/OXON-AE0D7/2020|EPI_ISL_448662|2020
>hCoV-19/England/OXON-AE0F5/2020|EPI_ISL_448663|2020
>hCoV-19/England/OXON-AE110/2020|EPI_ISL_448664|2020
>hCoV-19/England/OXON-AE15C/2020|EPI_ISL_448666|2020
>hCoV-19/England/OXON-AE17A/2020|EPI_ISL_448667|2020
>hCoV-19/England/OXON-AE189/2020|EPI_ISL_448668|2020
>hCoV-19/England/OXON-AE198/2020|EPI_ISL_448669|2020
>hCoV-19/England/OXON-AE1B6/2020|EPI_ISL_448670|2020
>hCoV-19/England/OXON-AE1D4/2020|EPI_ISL_448671|2020
>hCoV-19/England/OXON-AE1F2/2020|EPI_ISL_448672|2020
>hCoV-19/England/OXON-AE21D/2020|EPI_ISL_448673|2020
>hCoV-19/England/OXON-AE22C/2020|EPI_ISL_448674|2020
>hCoV-19/England/OXON-AE23B/2020|EPI_ISL_448675|2020
>hCoV-19/England/OXON-AE259/2020|EPI_ISL_448676|2020
>hCoV-19/England/OXON-AE295/2020|EPI_ISL_448678|2020
>hCoV-19/England/OXON-AE2B3/2020|EPI_ISL_448679|2020
>hCoV-19/England/OXON-AE2D1/2020|EPI_ISL_448680|2020
>hCoV-19/England/OXON-AE2FF/2020|EPI_ISL_448681|2020
>hCoV-19/England/OXON-AE31A/2020|EPI_ISL_448682|2020
>hCoV-19/England/OXON-AE338/2020|EPI_ISL_448684|2020
>hCoV-19/England/OXON-AE374/2020|EPI_ISL_448685|2020
>hCoV-19/England/OXON-AE392/2020|EPI_ISL_448686|2020
>hCoV-19/England/OXON-AE3B0/2020|EPI_ISL_448687|2020
>hCoV-19/England/OXON-AE3DE/2020|EPI_ISL_448688|2020
>hCoV-19/England/OXON-AE3FC/2020|EPI_ISL_448689|2020
>hCoV-19/England/OXON-AE417/2020|EPI_ISL_448690|2020
>hCoV-19/England/OXON-AE453/2020|EPI_ISL_448691|2020
>hCoV-19/England/OXON-AE471/2020|EPI_ISL_448692|2020
>hCoV-19/England/OXON-AE49F/2020|EPI_ISL_448694|2020
>hCoV-19/England/OXON-AE4AE/2020|EPI_ISL_448695|2020
>hCoV-19/England/OXON-AE4BD/2020|EPI_ISL_448696|2020
>hCoV-19/England/OXON-AE4DB/2020|EPI_ISL_448697|2020
>hCoV-19/England/OXON-AE4F9/2020|EPI_ISL_448698|2020
>hCoV-19/England/OXON-AE514/2020|EPI_ISL_448699|2020
>hCoV-19/Kenya/D6/2020|EPI_ISL_458000|2020-03-17
>hCoV-19/USA/NC_200460/2020|EPI_ISL_458002|2020-04
>hCoV-19/USA/NC_200467/2020|EPI_ISL_458003|2020-04
>hCoV-19/USA/NC_200468/2020|EPI_ISL_458004|2020-04
>hCoV-19/USA/NC_200486/2020|EPI_ISL_458005|2020-04
>hCoV-19/USA/NC_200488/2020|EPI_ISL_458006|2020-04
>hCoV-19/USA/NC_200222/2020|EPI_ISL_458007|2020-04
>hCoV-19/USA/NY-NYUMC878/2020|EPI_ISL_458017|2020-03-18
>hCoV-19/USA/NY-NYUMC879/2020|EPI_ISL_458018|2020-03-18
>hCoV-19/USA/NY-NYUMC880/2020|EPI_ISL_458019|2020-03-18
>hCoV-19/India/CCMB_C11/2020|EPI_ISL_458034|2020-04-29
>hCoV-19/India/CCMB_C13/2020|EPI_ISL_458035|2020-04-29
>hCoV-19/India/CCMB_C10/2020|EPI_ISL_458036|2020-04-29
>hCoV-19/India/CCMB_C7/2020|EPI_ISL_458037|2020-04-29
>hCoV-19/India/CCMB_C19/2020|EPI_ISL_458040|2020-05-06
>hCoV-19/India/CCMB_C15/2020|EPI_ISL_458041|2020-05-06
>hCoV-19/India/CCMB_C18/2020|EPI_ISL_458042|2020-05-06
>hCoV-19/India/CCMB_C14/2020|EPI_ISL_458043|2020-05-06
>hCoV-19/India/CCMB_C17/2020|EPI_ISL_458044|2020-05-06
>hCoV-19/India/CCMB_L1017/2020|EPI_ISL_458045|2020-05-11
>hCoV-19/India/CCMB_L1021/2020|EPI_ISL_458046|2020-05-11
>hCoV-19/India/CCMB_L1022/2020|EPI_ISL_458047|2020-05-11
>hCoV-19/India/CCMB_L1024/2020|EPI_ISL_458048|2020-05-11
>hCoV-19/India/CCMB_L1025/2020|EPI_ISL_458049|2020-05-11
>hCoV-19/India/CCMB_L1026/2020|EPI_ISL_458050|2020-05-11
>hCoV-19/India/CCMB_L1062/2020|EPI_ISL_458051|2020-05-12
>hCoV-19/India/CCMB_L1063/2020|EPI_ISL_458052|2020-05-12
>hCoV-19/India/CCMB_L1064/2020|EPI_ISL_458053|2020-05-12
>hCoV-19/India/CCMB_L1073/2020|EPI_ISL_458054|2020-05-13
>hCoV-19/India/CCMB_L1082/2020|EPI_ISL_458055|2020-05-13
>hCoV-19/India/CCMB_L1085/2020|EPI_ISL_458056|2020-05-13
>hCoV-19/India/CCMB_L1089/2020|EPI_ISL_458057|2020-05-13
>hCoV-19/India/CCMB_L1090/2020|EPI_ISL_458058|2020-05-13
>hCoV-19/India/CCMB_L1100/2020|EPI_ISL_458059|2020-05-13
>hCoV-19/India/CCMB_L1103/2020|EPI_ISL_458060|2020-05-13
>hCoV-19/India/CCMB_L1108/2020|EPI_ISL_458061|2020-05-13
>hCoV-19/India/CCMB_L299/2020|EPI_ISL_458062|2020-04-20
>hCoV-19/India/CCMB_L301/2020|EPI_ISL_458063|2020-04-20
>hCoV-19/India/CCMB_L988/2020|EPI_ISL_458064|2020-05-11
>hCoV-19/India/CCMB_L989/2020|EPI_ISL_458065|2020-05-11
>hCoV-19/India/CCMB_O1/2020|EPI_ISL_458066|2020-04-13
>hCoV-19/India/CCMB_O2/2020|EPI_ISL_458067|2020-04-15
>hCoV-19/India/CCMB_O3/2020|EPI_ISL_458068|2020-04-14
>hCoV-19/India/CCMB_O4/2020|EPI_ISL_458069|2020-04-03
>hCoV-19/India/CCMB_K272/2020|EPI_ISL_458070|2020-04-12
>hCoV-19/India/CCMB_J130/2020|EPI_ISL_458071|2020-04-01
>hCoV-19/India/CCMB_J812_P1/2020|EPI_ISL_458072|2020-04-08
>hCoV-19/India/CCMB_L276_P1/2020|EPI_ISL_458073|2020-04-20
>hCoV-19/India/CCMB_L301_P1/2020|EPI_ISL_458074|2020-04-20
>hCoV-19/India/CCMB_O2_P1/2020|EPI_ISL_458075|2020-04-15
>hCoV-19/India/CCMB_L302_P1/2020|EPI_ISL_458076|2020-04-20
>hCoV-19/India/CCMB_L040_P1/2020|EPI_ISL_458077|2020-04-18
>hCoV-19/Indonesia/EJ-ITD1238Sp/2020|EPI_ISL_458079|2020-03-30
>hCoV-19/India/CCMB_J300/2020|EPI_ISL_458080|2020-04-03
>hCoV-19/Indonesia/EJ-ITD1273NT/2020|EPI_ISL_458081|2020-03-30
>hCoV-19/ITALY/SardiniaNuoro04039046/2020|EPI_ISL_458084|2020-04-03
>hCoV-19/ITALY/SardiniaNuoroCOV28/2020|EPI_ISL_458085|2020-04-12
>hCoV-19/India/GBRC131/2020|EPI_ISL_458086|2020-05-24
>hCoV-19/India/GBRC132/2020|EPI_ISL_458087|2020-05-24
>hCoV-19/India/GBRC133/2020|EPI_ISL_458088|2020-05-24
>hCoV-19/India/GBRC134/2020|EPI_ISL_458089|2020-05-24
>hCoV-19/India/GBRC135a/2020|EPI_ISL_458090|2020-05-24
>hCoV-19/India/GBRC135b/2020|EPI_ISL_458091|2020-05-24
>hCoV-19/India/GBRC136a/2020|EPI_ISL_458092|2020-05-24
>hCoV-19/India/GBRC136b/2020|EPI_ISL_458093|2020-05-24
>hCoV-19/India/GBRC137a/2020|EPI_ISL_458094|2020-05-24
>hCoV-19/India/GBRC137b/2020|EPI_ISL_458095|2020-05-24
>hCoV-19/India/GBRC138/2020|EPI_ISL_458096|2020-05-24
>hCoV-19/India/GBRC139a/2020|EPI_ISL_458097|2020-05-24
>hCoV-19/India/GBRC139b/2020|EPI_ISL_458098|2020-05-24
>hCoV-19/India/GBRC140/2020|EPI_ISL_458099|2020-05-24
>hCoV-19/USA/MA1/2020|EPI_ISL_409067|2020-01-29
>hCoV-19/USA/CA6/2020|EPI_ISL_410044|2020-01-27
>hCoV-19/USA/IL2/2020|EPI_ISL_410045|2020-01-28
>hCoV-19/England/20148004904/2020|EPI_ISL_422001|2020-04-03
>hCoV-19/England/20148006104/2020|EPI_ISL_422002|2020-03-30
>hCoV-19/England/20148039404/2020|EPI_ISL_422009|2020-04-02
>hCoV-19/England/20148041604/2020|EPI_ISL_422010|2020-04-02
>hCoV-19/Wales/PHWC-26796/2020|EPI_ISL_422016|2020-03-28
>hCoV-19/Wales/PHWC-2711F/2020|EPI_ISL_422017|2020-03-29
>hCoV-19/Wales/PHWC-2673C/2020|EPI_ISL_422018|2020-03-28
>hCoV-19/Wales/PHWC-265E7/2020|EPI_ISL_422019|2020-03-27
>hCoV-19/Wales/PHWC-2682A/2020|EPI_ISL_422020|2020-03-27
>hCoV-19/Wales/PHWC-2665D/2020|EPI_ISL_422021|2020-03-27
>hCoV-19/Wales/PHWC-26D49/2020|EPI_ISL_422022|2020-03-30
>hCoV-19/Wales/PHWC-26981/2020|EPI_ISL_422023|2020-03-30
>hCoV-19/Wales/PHWC-26B12/2020|EPI_ISL_422024|2020-03-29
>hCoV-19/Wales/PHWC-263DE/2020|EPI_ISL_422025|2020-03-27
>hCoV-19/Wales/PHWC-263FC/2020|EPI_ISL_422026|2020-03-27
>hCoV-19/Wales/PHWC-2672D/2020|EPI_ISL_422027|2020-03-27
>hCoV-19/Wales/PHWC-2631A/2020|EPI_ISL_422028|2020-03-27
>hCoV-19/Wales/PHWC-25F44/2020|EPI_ISL_422029|2020-03-25
>hCoV-19/Wales/PHWC-270B8/2020|EPI_ISL_422030|2020-03-29
>hCoV-19/Wales/PHWC-26DD0/2020|EPI_ISL_422031|2020-03-30
>hCoV-19/Wales/PHWC-2649F/2020|EPI_ISL_422032|2020-03-27
>hCoV-19/Wales/PHWC-2681B/2020|EPI_ISL_422033|2020-03-27
>hCoV-19/Wales/PHWC-27012/2020|EPI_ISL_422034|2020-03-28
>hCoV-19/Wales/PHWC-26D58/2020|EPI_ISL_422035|2020-03-30
>hCoV-19/Wales/PHWC-26A15/2020|EPI_ISL_422036|2020-03-29
>hCoV-19/Wales/PHWC-2663F/2020|EPI_ISL_422037|2020-03-27
>hCoV-19/Wales/PHWC-2621D/2020|EPI_ISL_422038|2020-03-26
>hCoV-19/Iceland/593/2020|EPI_ISL_424613|2020-03-27
>hCoV-19/Iceland/594/2020|EPI_ISL_424614|2020-03-27
>hCoV-19/Iceland/595/2020|EPI_ISL_424615|2020-03-27
>hCoV-19/Iceland/596/2020|EPI_ISL_424616|2020-03-28
>hCoV-19/Iceland/597/2020|EPI_ISL_424617|2020-03-28
>hCoV-19/Iceland/598/2020|EPI_ISL_424618|2020-03-27
>hCoV-19/Iceland/599/2020|EPI_ISL_424619|2020-03-28
>hCoV-19/Iceland/600/2020|EPI_ISL_424620|2020-03-28
>hCoV-19/Iceland/601/2020|EPI_ISL_424621|2020-03-28
>hCoV-19/Iceland/602/2020|EPI_ISL_424622|2020-03-28
>hCoV-19/Iceland/603/2020|EPI_ISL_424623|2020-03-28
>hCoV-19/Iceland/604/2020|EPI_ISL_424624|2020-03-28
>hCoV-19/Mexico/CDMX-INER_03/2020|EPI_ISL_424625|2020-03-13
>hCoV-19/Mexico/CDMX-INER_04/2020|EPI_ISL_424626|2020-03-15
>hCoV-19/Mexico/CDMX-INER_05/2020|EPI_ISL_424627|2020-03-16
>hCoV-19/Belgium/ULG-10066/2020|EPI_ISL_424629|2020-04-03
>hCoV-19/Belgium/ULG-10067/2020|EPI_ISL_424630|2020-04-03
>hCoV-19/Belgium/ULG-10072/2020|EPI_ISL_424631|2020-04-03
>hCoV-19/Belgium/ULG-10069/2020|EPI_ISL_424633|2020-04-03
>hCoV-19/Belgium/ULG-10065/2020|EPI_ISL_424635|2020-04-03
>hCoV-19/Belgium/ULG-10068/2020|EPI_ISL_424636|2020-04-03
>hCoV-19/Belgium/ULG-10078/2020|EPI_ISL_424637|2020-04-03
>hCoV-19/Belgium/ULG-10081/2020|EPI_ISL_424640|2020-04-03
>hCoV-19/Belgium/ULG-10080/2020|EPI_ISL_424641|2020-04-03
>hCoV-19/Belgium/ULG-10077/2020|EPI_ISL_424642|2020-04-04
>hCoV-19/Belgium/ULG-10089/2020|EPI_ISL_424643|2020-04-04
>hCoV-19/Belgium/ULG-10086/2020|EPI_ISL_424644|2020-04-04
>hCoV-19/Belgium/ULG-10085/2020|EPI_ISL_424645|2020-04-04
>hCoV-19/Belgium/ULG-10088/2020|EPI_ISL_424646|2020-04-04
>hCoV-19/Belgium/ULG-10092/2020|EPI_ISL_424647|2020-04-04
>hCoV-19/Belgium/ULG-10082/2020|EPI_ISL_424649|2020-04-04
>hCoV-19/Belgium/ULG-10094/2020|EPI_ISL_424650|2020-04-04
>hCoV-19/Belgium/ULG-10095/2020|EPI_ISL_424651|2020-04-05
>hCoV-19/Belgium/ULG-10055/2020|EPI_ISL_424652|2020-04-05
>hCoV-19/Belgium/ULG-10058/2020|EPI_ISL_424653|2020-04-05
>hCoV-19/Belgium/ULG-10057/2020|EPI_ISL_424654|2020-04-05
>hCoV-19/Belgium/ULG-10056/2020|EPI_ISL_424655|2020-04-05
>hCoV-19/Belgium/ULG-10052/2020|EPI_ISL_424657|2020-04-05
>hCoV-19/Belgium/ULG-10049/2020|EPI_ISL_424658|2020-04-05
>hCoV-19/Belgium/ULG-10051/2020|EPI_ISL_424660|2020-04-05
>hCoV-19/Belgium/ULG-10053/2020|EPI_ISL_424661|2020-04-05
>hCoV-19/Belgium/ULG-10061/2020|EPI_ISL_424662|2020-04-05
>hCoV-19/Belgium/ULG-10062/2020|EPI_ISL_424664|2020-04-05
>hCoV-19/Mexico/Chiapas-InDRE_02/2020|EPI_ISL_424666|2020-02-29
>hCoV-19/Mexico/EdoMex-InDRE_03/2020|EPI_ISL_424667|2020-03-04
>hCoV-19/USA/AZ-ASU2922/2020|EPI_ISL_424668|2020-03-16
>hCoV-19/USA/AZ-ASU2923/2020|EPI_ISL_424669|2020-03-16
>hCoV-19/Mexico/Queretaro-InDRE_04/2020|EPI_ISL_424670|2020-03-10
>hCoV-19/USA/AZ-ASU2936/2020|EPI_ISL_424671|2020-03-17
>hCoV-19/Mexico/Puebla-InDRE_05/2020|EPI_ISL_424672|2020-03-11
>hCoV-19/Mexico/CDMX-InDRE_06/2020|EPI_ISL_424673|2020-03-12
>hCoV-19/England/CAMB-7C166/2020|EPI_ISL_434001|2020-04-13
>hCoV-19/England/CAMB-7C175/2020|EPI_ISL_434002|2020-04-12
>hCoV-19/England/CAMB-7C1C0/2020|EPI_ISL_434007|2020
>hCoV-19/England/CAMB-7C227/2020|EPI_ISL_434013|2020-04-14
>hCoV-19/England/CAMB-7C236/2020|EPI_ISL_434014|2020-04-12
>hCoV-19/USA/WA-S303/2020|EPI_ISL_434063|2020-04-03
>hCoV-19/USA/WA-S304/2020|EPI_ISL_434064|2020-04-05
>hCoV-19/USA/WA-S305/2020|EPI_ISL_434065|2020-04-01
>hCoV-19/USA/WA-S307/2020|EPI_ISL_434067|2020-03-28
>hCoV-19/USA/WA-S308/2020|EPI_ISL_434068|2020-04-02
>hCoV-19/USA/WA-S310/2020|EPI_ISL_434070|2020-04-01
>hCoV-19/USA/WA-S311/2020|EPI_ISL_434071|2020-04-04
>hCoV-19/USA/WA-S312/2020|EPI_ISL_434072|2020-04-01
>hCoV-19/USA/WA-S313/2020|EPI_ISL_434073|2020-04-02
>hCoV-19/USA/WA-S314/2020|EPI_ISL_434074|2020-04-03
>hCoV-19/USA/WA-S315/2020|EPI_ISL_434075|2020-04-02
>hCoV-19/USA/WA-S316/2020|EPI_ISL_434076|2020-04-01
>hCoV-19/USA/WA-S317/2020|EPI_ISL_434077|2020-04-04
>hCoV-19/USA/WA-S319/2020|EPI_ISL_434079|2020-04-04
>hCoV-19/USA/WI-UW-306/2020|EPI_ISL_436600|2020-04-14
>hCoV-19/USA/WI-UW-307/2020|EPI_ISL_436601|2020-04-15
>hCoV-19/USA/WI-UW-308/2020|EPI_ISL_436602|2020-04-16
>hCoV-19/USA/WI-UW-309/2020|EPI_ISL_436603|2020-04-16
>hCoV-19/USA/WI-UW-310/2020|EPI_ISL_436604|2020-04-15
>hCoV-19/USA/WI-UW-311/2020|EPI_ISL_436605|2020-04-14
>hCoV-19/USA/WI-UW-312/2020|EPI_ISL_436606|2020-04-27
>hCoV-19/USA/WI-UW-313/2020|EPI_ISL_436607|2020-04-16
>hCoV-19/USA/WI-UW-314/2020|EPI_ISL_436608|2020-04-16
>hCoV-19/USA/WI-UW-315/2020|EPI_ISL_436609|2020-04-17
>hCoV-19/USA/WI-UW-316/2020|EPI_ISL_436610|2020-04-18
>hCoV-19/USA/WI-UW-318/2020|EPI_ISL_436612|2020-04-19
>hCoV-19/USA/WI-UW-319/2020|EPI_ISL_436613|2020-04-21
>hCoV-19/USA/WI-UW-320/2020|EPI_ISL_436614|2020-04-21
>hCoV-19/USA/WI-UW-321/2020|EPI_ISL_436615|2020-04-23
>hCoV-19/USA/WI-UW-322/2020|EPI_ISL_436616|2020-04-23
>hCoV-19/USA/WI-UW-323/2020|EPI_ISL_436617|2020-04-23
>hCoV-19/USA/WI-UW-324/2020|EPI_ISL_436618|2020-04-24
>hCoV-19/USA/WI-UW-325/2020|EPI_ISL_436619|2020-04-24
>hCoV-19/USA/WI-UW-326/2020|EPI_ISL_436620|2020-04-25
>hCoV-19/USA/WI-UW-327/2020|EPI_ISL_436621|2020-04-25
>hCoV-19/USA/WI-UW-328/2020|EPI_ISL_436622|2020-04-26
>hCoV-19/USA/WI-UW-329/2020|EPI_ISL_436623|2020-04-25
>hCoV-19/USA/WI-UW-331/2020|EPI_ISL_436625|2020-04-26
>hCoV-19/USA/WI-UW-332/2020|EPI_ISL_436626|2020-04-26
>hCoV-19/USA/WI-UW-333/2020|EPI_ISL_436627|2020-03-24
>hCoV-19/USA/WI-UW-334/2020|EPI_ISL_436628|2020-03-24
>hCoV-19/USA/WI-UW-335/2020|EPI_ISL_436629|2020-03-24
>hCoV-19/USA/WI-UW-336/2020|EPI_ISL_436630|2020-03-25
>hCoV-19/USA/WI-UW-337/2020|EPI_ISL_436631|2020-03-26
>hCoV-19/USA/WI-UW-338/2020|EPI_ISL_436632|2020-03-26
>hCoV-19/USA/WI-UW-340/2020|EPI_ISL_436634|2020-04-01
>hCoV-19/USA/WI-UW-341/2020|EPI_ISL_436635|2020-04-02
>hCoV-19/USA/WI-UW-342/2020|EPI_ISL_436636|2020-04-04
>hCoV-19/USA/WI-UW-343/2020|EPI_ISL_436637|2020-04-05
>hCoV-19/USA/WI-UW-344/2020|EPI_ISL_436638|2020-04-06
>hCoV-19/USA/WI-UW-346/2020|EPI_ISL_436640|2020-04-21
>hCoV-19/USA/CA-CZB-1000/2020|EPI_ISL_436641|2020-03-31
>hCoV-19/USA/CA-CZB-1001/2020|EPI_ISL_436642|2020-04-01
>hCoV-19/USA/CA-CZB-1002/2020|EPI_ISL_436643|2020-04-01
>hCoV-19/USA/CA-CZB-1003/2020|EPI_ISL_436644|2020-04-02
>hCoV-19/USA/CA-CZB-1004/2020|EPI_ISL_436645|2020-04-01
>hCoV-19/USA/CA-CZB-1005/2020|EPI_ISL_436646|2020-04-04
>hCoV-19/USA/CA-CZB-1006/2020|EPI_ISL_436647|2020-04-04
>hCoV-19/USA/CA-CZB-1007/2020|EPI_ISL_436648|2020-04-02
>hCoV-19/USA/CA-CZB-1009/2020|EPI_ISL_436650|2020-04-05
>hCoV-19/USA/CA-CZB-1010/2020|EPI_ISL_436651|2020-04-03
>hCoV-19/USA/CA-CZB-1011/2020|EPI_ISL_436652|2020-04-05
>hCoV-19/USA/CA-CZB-1012/2020|EPI_ISL_436653|2020-04-09
>hCoV-19/USA/CA-CZB-1013/2020|EPI_ISL_436654|2020-04-07
>hCoV-19/USA/CA-CZB-1014/2020|EPI_ISL_436655|2020-04-07
>hCoV-19/USA/CA-CZB-1015/2020|EPI_ISL_436656|2020-04-09
>hCoV-19/USA/CA-CZB-1016/2020|EPI_ISL_436657|2020-04-09
>hCoV-19/USA/CA-CZB-1017/2020|EPI_ISL_436658|2020-04-09
>hCoV-19/USA/CA-CZB-1018/2020|EPI_ISL_436659|2020-04-10
>hCoV-19/USA/CA-CZB-1019/2020|EPI_ISL_436660|2020-04-10
>hCoV-19/USA/CA-CZB-1020/2020|EPI_ISL_436661|2020-04-09
>hCoV-19/USA/CA-CZB-1021/2020|EPI_ISL_436662|2020-04-11
>hCoV-19/USA/CA-CZB-1022/2020|EPI_ISL_436663|2020-04-11
>hCoV-19/USA/CA-CZB-1023/2020|EPI_ISL_436664|2020-04-11
>hCoV-19/USA/CA-CZB-1024/2020|EPI_ISL_436665|2020-04-10
>hCoV-19/USA/CA-CZB-1025/2020|EPI_ISL_436666|2020-04-11
>hCoV-19/USA/CA-CZB-1026/2020|EPI_ISL_436667|2020-04-11
>hCoV-19/USA/CA-CZB-1028/2020|EPI_ISL_436669|2020-04-13
>hCoV-19/USA/CA-CZB-1029/2020|EPI_ISL_436670|2020-04-16
>hCoV-19/USA/CA-CZB-1030/2020|EPI_ISL_436671|2020-04-18
>hCoV-19/USA/CA-CZB-1031/2020|EPI_ISL_436672|2020-03-29
>hCoV-19/USA/CA-CZB-1032/2020|EPI_ISL_436673|2020-04-01
>hCoV-19/USA/CA-CZB-1033/2020|EPI_ISL_436674|2020-03-31
>hCoV-19/USA/CA-CZB-1034/2020|EPI_ISL_436675|2020-04-01
>hCoV-19/USA/CA-CZB-1035/2020|EPI_ISL_436676|2020-04-01
>hCoV-19/USA/CA-CZB-1036/2020|EPI_ISL_436677|2020-04-02
>hCoV-19/USA/CA-CZB-1037/2020|EPI_ISL_436678|2020-04-03
>hCoV-19/USA/CA-CZB-1038/2020|EPI_ISL_436679|2020-04-04
>hCoV-19/USA/MI-MDHHS-SC20136/2020|EPI_ISL_436812|2020-03-13
>hCoV-19/USA/MI-MDHHS-SC20158/2020|EPI_ISL_436814|2020-03-13
>hCoV-19/USA/MI-MDHHS-SC20130/2020|EPI_ISL_436815|2020-03-14
>hCoV-19/USA/MI-MDHHS-SC20147/2020|EPI_ISL_436818|2020-03-16
>hCoV-19/USA/MI-MDHHS-SC20154/2020|EPI_ISL_436819|2020-03-16
>hCoV-19/USA/MI-MDHHS-SC20139/2020|EPI_ISL_436820|2020-03-17
>hCoV-19/USA/MI-MDHHS-SC20163/2020|EPI_ISL_436821|2020-03-17
>hCoV-19/USA/MI-MDHHS-SC20110/2020|EPI_ISL_436822|2020-03-18
>hCoV-19/USA/MI-MDHHS-SC20161/2020|EPI_ISL_436823|2020-03-18
>hCoV-19/USA/MI-MDHHS-SC20175/2020|EPI_ISL_436824|2020-03-18
>hCoV-19/USA/MI-MDHHS-SC20156/2020|EPI_ISL_436825|2020-03-19
>hCoV-19/USA/MI-MDHHS-SC20171/2020|EPI_ISL_436827|2020-03-19
>hCoV-19/USA/MI-MDHHS-SC20137/2020|EPI_ISL_436829|2020-03-20
>hCoV-19/USA/MI-MDHHS-SC20153/2020|EPI_ISL_436830|2020-03-21
>hCoV-19/USA/MI-MDHHS-SC20107/2020|EPI_ISL_436831|2020-03-22
>hCoV-19/USA/MI-MDHHS-SC20132/2020|EPI_ISL_436833|2020-03-22
>hCoV-19/Wales/PHWC-2E048/2020|EPI_ISL_446050|2020-04-10
>hCoV-19/England/OXON-AD876/2020|EPI_ISL_448600|2020
>hCoV-19/England/OXON-AD894/2020|EPI_ISL_448601|2020
>hCoV-19/England/OXON-AD8D0/2020|EPI_ISL_448602|2020
>hCoV-19/England/OXON-AD8FE/2020|EPI_ISL_448603|2020
>hCoV-19/England/OXON-AD937/2020|EPI_ISL_448604|2020
>hCoV-19/England/OXON-AD973/2020|EPI_ISL_448605|2020
>hCoV-19/England/OXON-AD991/2020|EPI_ISL_448606|2020
>hCoV-19/England/OXON-AD9BF/2020|EPI_ISL_448607|2020
>hCoV-19/England/OXON-AD9DD/2020|EPI_ISL_448608|2020
>hCoV-19/England/OXON-ADA16/2020|EPI_ISL_448609|2020
>hCoV-19/England/OXON-ADA34/2020|EPI_ISL_448610|2020
>hCoV-19/England/OXON-ADA9E/2020|EPI_ISL_448611|2020
>hCoV-19/England/OXON-ADABC/2020|EPI_ISL_448612|2020
>hCoV-19/England/OXON-ADADA/2020|EPI_ISL_448613|2020
>hCoV-19/England/OXON-ADAF8/2020|EPI_ISL_448614|2020
>hCoV-19/England/OXON-ADB31/2020|EPI_ISL_448616|2020
>hCoV-19/England/OXON-ADB5F/2020|EPI_ISL_448617|2020
[truncated: 24,016 more rows]
